# Supplementary material for: P(V)-Promoted Rh-Catalyzed Highly Regioselective Hydroformylation of Styrenes under Mild Conditions
Source: MDPI journal article supplement (doi:10.3390/molecules29092039), 2024-04-28
Supplement: s1 [file s1]

# P(V)-Promoted Rh-Catalyzed Highly Regioselective Hydroformylation of Styrenes under Mild Conditions

Tong Ru <sup>1,2,3</sup>, Yajiao Zhang <sup>2,3,4</sup>, Qiuxiang Wei <sup>2,3,4</sup>, Sheng Zuo <sup>2,3</sup>, Zhenhua Jia <sup>2,3,\*</sup> and Fen-Er Chen <sup>1,2,3,4,\*</sup>

<sup>1</sup> Department of Medicinal Chemistry, School of Pharmacy, Fudan University, Shanghai 201203, China; 19111030025@fudan.edu.cn

<sup>2</sup> Engineering Center of Catalysis and Synthesis for Chiral Molecules, Department of Chemistry, Fudan University, Shanghai 200433, China; 200410027@fzu.edu.cn (Y.Z.); qiuxiangwei21@163.com (Q.W.)

<sup>3</sup> Shanghai Engineering Center of Industrial Asymmetric Catalysis for Chiral Drugs, Shanghai 200433, China

<sup>4</sup> College of Chemical Engineering, Fuzhou University, Fuzhou 350102, China

\* Correspondence: zhenhua\_jia@fudan.edu.cn (Z.J.); rfchen@fudan.edu.cn (F.-E.C.)

## Supporting Information

### CONTENT

|                                                                                |     |
|--------------------------------------------------------------------------------|-----|
| 1. Supporting tables and figures.....                                          | S2  |
| 2. General information.....                                                    | S6  |
| 3. Synthesis of the phosphate .....                                            | S6  |
| 3.1 Synthesis of ( <i>R</i> )-P4 .....                                         | S7  |
| 3.2 Synthesis of ( <i>R</i> , <i>R</i> )-P5 .....                              | S7  |
| 3.3 Synthesis of ( <i>S</i> , <i>R</i> )-P6 .....                              | S8  |
| 3.4 Synthesis of ( <i>S</i> , <i>R</i> )-P7 .....                              | S8  |
| 3.5 Synthesis of ( <i>S</i> , <i>R</i> )-P8 .....                              | S9  |
| 3.6 Synthesis of ( <i>R</i> , <i>R</i> )-P9 .....                              | S9  |
| 3.7 Synthesis of ( <i>S</i> , <i>R</i> )-P10 .....                             | S11 |
| 3.8 Synthesis of ( <i>S</i> , <i>S</i> , <i>S</i> , <i>S</i> )-P11 .....       | S11 |
| 4. Deuteration of styrene.....                                                 | S12 |
| 5. General procedure for hydroformylation .....                                | S12 |
| 6. Characterization data of <i>rac</i> - $\alpha$ -aryl propionaldehydes ..... | S13 |
| 7. Isotope effect measurement.....                                             | S18 |
| 8. References .....                                                            | S19 |
| 9. IR spectra .....                                                            | S20 |

## 1. Supporting table and figures

Table S1 Effect of the concentration of TPP and P6.

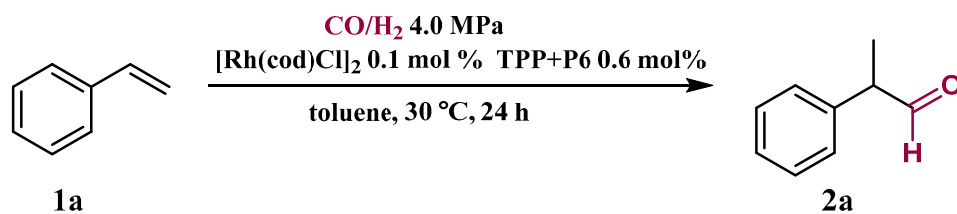

| Entry          | TPP (mol%) | P6 (mol%) | Yield <sup>a</sup> |
|----------------|------------|-----------|--------------------|
| 1              | 0.6        | 0         | 4.9%               |
| 2              | 0.5        | 0.1       | 6%                 |
| 3              | 0.4        | 0.2       | 7%                 |
| 4              | 0.3        | 0.3       | 10%                |
| 5              | 0.2        | 0.4       | 21%                |
| 6              | 0.1        | 0.5       | 40%                |
| 7 <sup>b</sup> | 0          | 0.6       | 96%                |

<sup>a</sup> Yields were determined by GC-MS; <sup>b</sup> Standard condition.

# Area Percent Report

Data Path : D:\Data\2024\  
 Data File : 20240121-RT-S.D  
 Acq On : 21 Jan 2024 23:10  
 Operator :  
 Sample : 20240121-RT-S  
 Misc :  
 ALS Vial : 10 Sample Multiplier: 1

Integration Parameters: autoint1.e  
 Integrator: ChemStation

Method : D:\Data\METHODS\GEN-01-45C-01.M  
 Title :

Signal : TIC: 20240121-RT-S.D\data.ms

| peak<br># | R.T.<br>min | first<br>scan | max<br>scan | last<br>scan | PK<br>TY | peak<br>height | corr.<br>area | corr.<br>% max. | % of<br>total |
|-----------|-------------|---------------|-------------|--------------|----------|----------------|---------------|-----------------|---------------|
| 1         | 5.161       | 264           | 272         | 387          | M        | 11327650       | 365768597     | 100.00%         | 96.230%       |
| 2         | 6.414       | 394           | 405         | 419          | M        | 106945         | 14331416      | 3.92%           | 3.770%        |

Sum of corrected areas: 380100013

GEN-01-45C-01.M Tue Jan 23 15:48:40 2024

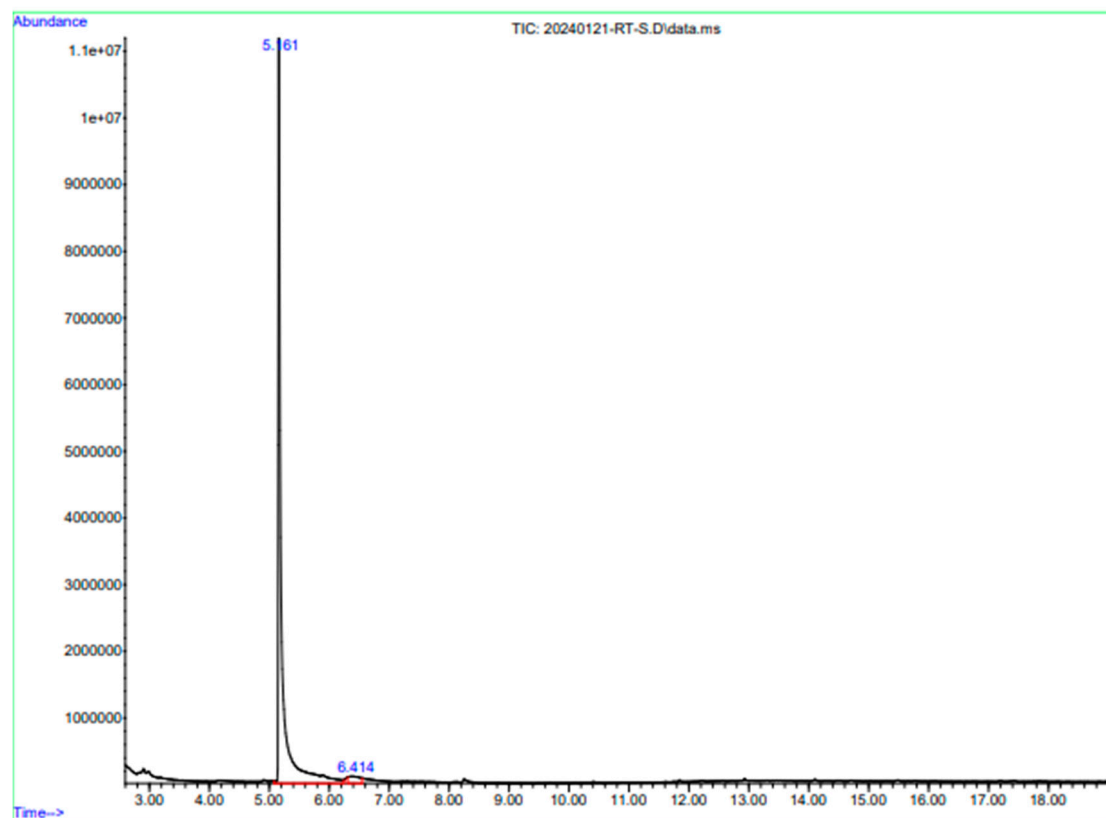

Figure S1 GC diagram of crude reaction mixture

## Display Report

### Analysis Info

Acquisition Date 1/15/2024 19:19:55 PM

Sample Name 20240115-RT-OP  
Comment

### Acquisition Parameter

|             |          |                      |          |                  |           |
|-------------|----------|----------------------|----------|------------------|-----------|
| Source Type | ESI      | Ion Polarity         | Positive | Set Nebulizer    | 2.0 Bar   |
| Focus       | Active   | Set Capillary        | 4500 V   | Set Dry Heater   | 200 °C    |
| Scan Begin  | 50 m/z   | Set End Plate Offset | -500 V   | Set Dry Gas      | 8.0 l/min |
| Scan End    | 3000 m/z | Set Charging Voltage | 2000 V   | Set Divert Valve | Waste     |
|             |          | Set Corona           | 0 nA     | Set APCI Heater  | 0 °C      |

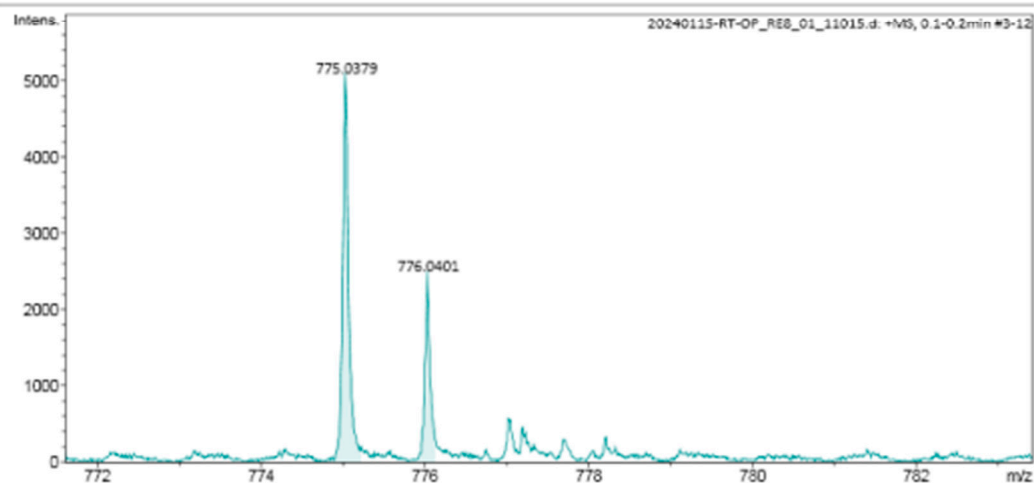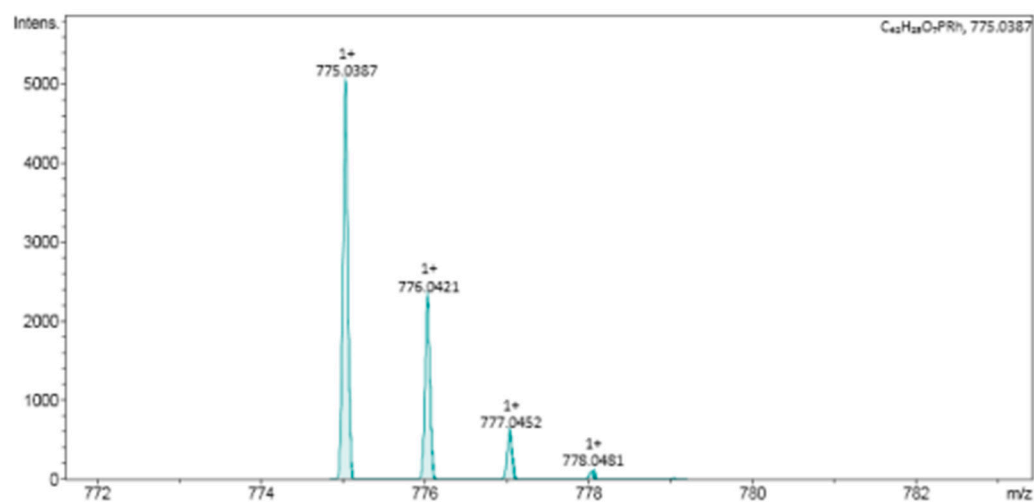

20240115-RT-OP\_RE8\_01\_11015.d

printed: 1/15/2024 19:26:38 PM

Page 1 of 1

**Figure S2 HRMS-ESI of Rh(COD)P6.**

## Display Report

### Analysis Info

Acquisition Date 1/15/2024 19:46:12 PM

Sample Name 20240115-RT-OP-2  
Comment

### Acquisition Parameter

|             |          |                      |          |                  |           |
|-------------|----------|----------------------|----------|------------------|-----------|
| Source Type | ESI      | Ion Polarity         | Positive | Set Nebulizer    | 2.0 Bar   |
| Focus       | Active   | Set Capillary        | 4500 V   | Set Dry Heater   | 200 °C    |
| Scan Begin  | 50 m/z   | Set End Plate Offset | -500 V   | Set Dry Gas      | 8.0 l/min |
| Scan End    | 3000 m/z | Set Charging Voltage | 2000 V   | Set Divert Valve | Waste     |
|             |          | Set Corona           | 0 nA     | Set APCI Heater  | 0 °C      |

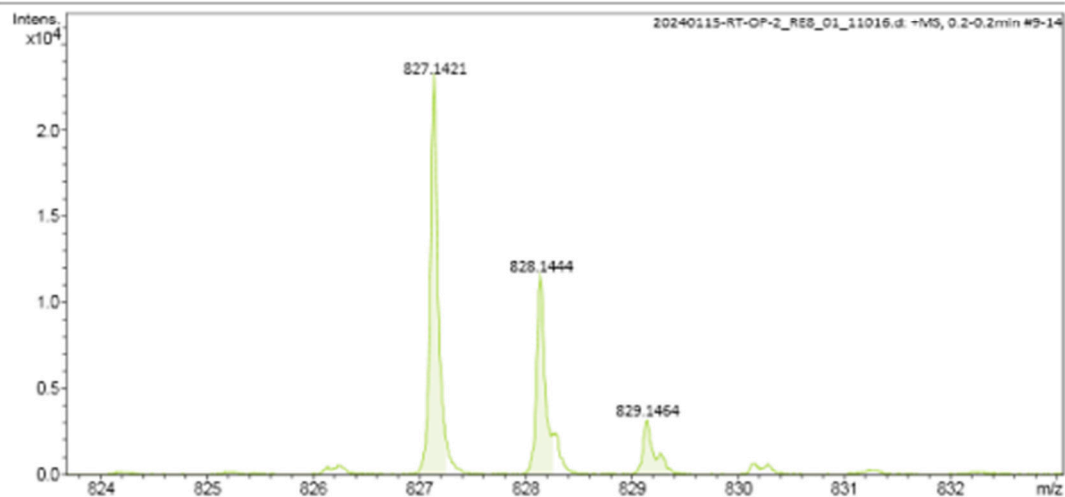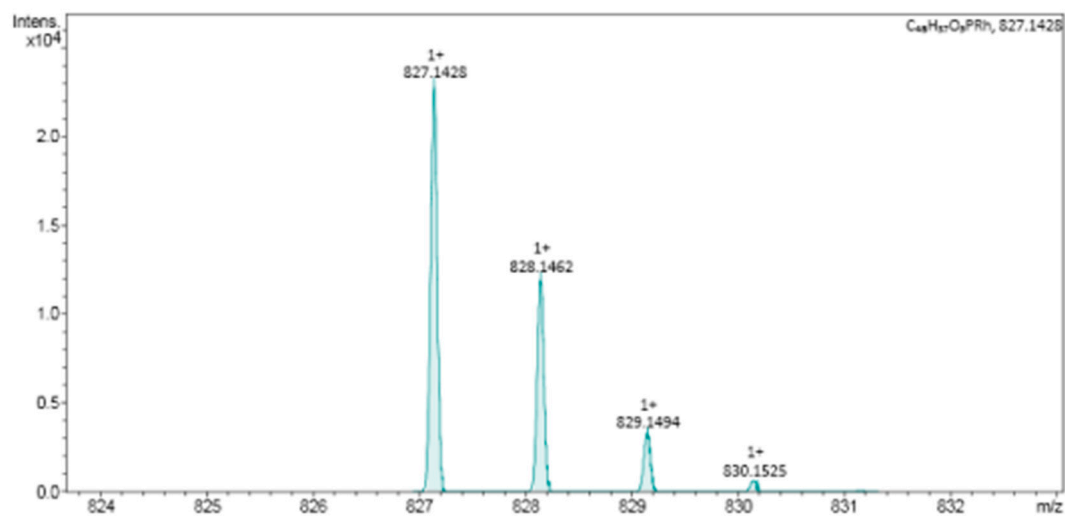

20240115-RT-OP-2\_RE8\_01\_11016.d

printed: 1/15/2024 19:50:13 PM

Page 1 of 1

Figure S3 HRMS-ESI of Rh(CO)<sub>2</sub>P6.

## 2. General information

All commercial reagents were used without further purification. When necessary, solvents were dried with standard procedures. NMR spectra were recorded on Bruker ADVANCE III (400 MHz) spectrometer.  $\text{CDCl}_3$  or  $\text{DMSO}-d_6$  was the solvent used for the NMR analysis, with tetramethylsilane as the internal standard. Data are reported as follows: chemical shift [multiplicity (br = broad, s = singlet, d = doublet, t = triplet, m = multiplet), coupling constant(s) in Hertz, integration]. GC-MS analysis was carried out on Agilent 7820A GC system and Agilent 5977B MSD. HRMS were recorded on a Bruker micrOTOF spectrometer (ESI). IR spectra were carried out on ThermoFisher NICOLET iS10 IR spectrometer.

## 3. Synthesis of the phosphates

### 3.1 Synthesis of (*R*)-**P4**<sup>[1,2,3,4]</sup>

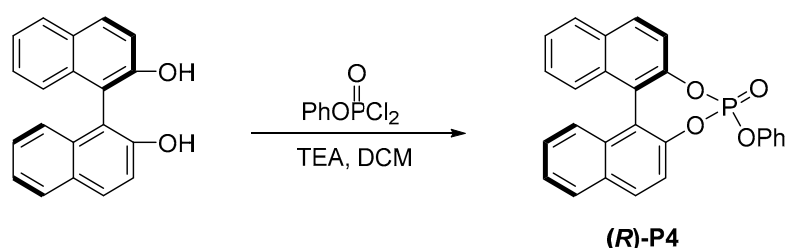

The (*R*)-(+)-1,1'-bi-2-naphthol (858 mg, 3 mmol) and  $\text{Et}_3\text{N}$  (1.2 ml, 9 mmol) was dissolved in dry  $\text{CH}_2\text{Cl}_2$  (10 ml), and then phenyl dichlorophosphate (756 mg, 3.6 mmol) was added dropwisely under argon at 0 °C. The reaction was allowed to warm to room temperature and stirred overnight. After that, the solid was removed by filtration. The filtrate was concentrated and purified by flash column chromatography ( $\text{CH}_2\text{Cl}_2$  /PE) to give product **P4** as a white solid (1.14 g, 90 % yield).  $^1\text{H}$  NMR (400 MHz,  $\text{CDCl}_3$ )  $\delta$  7.96 (d,  $J$  = 8.9 Hz, 1H), 7.90 (d,  $J$  = 8.9 Hz, 1H), 7.85 (d,  $J$  = 8.2 Hz, 2H), 7.55 (d,  $J$  = 8.9 Hz, 1H), 7.37 (q,  $J$  = 3.0 Hz, 3H), 7.29-7.18 (m, 8H), 7.14-7.09 (m, 1H).

### 3.2. Synthesis of (*R, R*)-**P5**

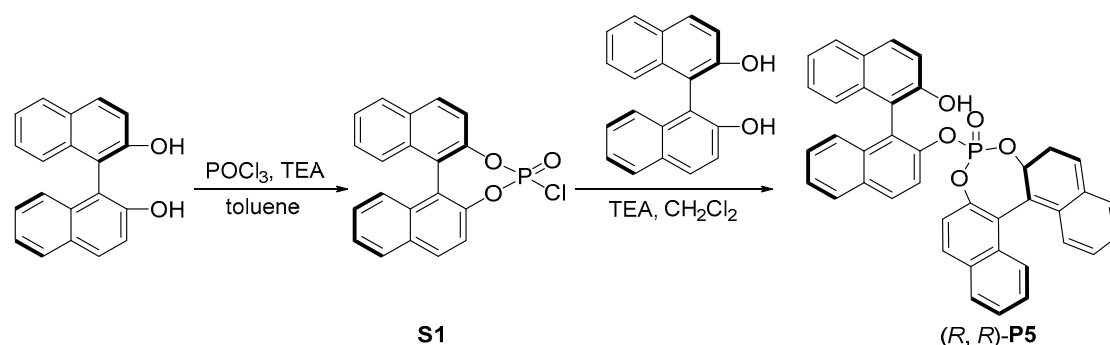

#### Preparation of chlorophosphonate **S1**

The (*R*)-(+)-1,1'-bi-2-naphthol (5 g, 17.5 mmol) and  $\text{Et}_3\text{N}$  (10 ml, 70 mmol) was dissolved in dry toluene (90 ml) and  $\text{POCl}_3$  (2.9 g, 19 mmol) was added dropwisely under argon at 0 °C. The reaction was stirred at room temperature overnight. The solid was removed by filtration. The filtrate was concentrated and purified by flash column chromatography ( $\text{EtOAc}$ /PE) to give product **S1** as white solid (4.99 g, 78 % yield).

### Preparation of the ligand (*R, R*)-**P5**

Under a nitrogen atmosphere, to a solution of **S1** (3.0 g, 8 mmol) and (*R*)-(+)-1,1'-bi-2-naphthol (2.3 g, 8 mmol) in anhydrous CH<sub>2</sub>Cl<sub>2</sub> (50 ml), Et<sub>3</sub>N (1.2 mL, 8 mmol) was added at 0 °C. The reaction was stirred at room temperature overnight. The solvent was removed under vacuum and the residue was purified by flash column chromatography (CH<sub>2</sub>Cl<sub>2</sub>/PE) to give product (*R, R*)-**P5** as white solid (3.44 g, 70 % yield). <sup>1</sup>H NMR (400 MHz, DMSO-*d*<sub>6</sub>) δ 9.58 (s, 1H), 8.24 (d, *J* = 8.9 Hz, 1H), 8.18 (s, 1H), 8.06 (dt, *J* = 13.3, 7.1 Hz, 3H), 7.89 (d, *J* = 8.6 Hz, 2H), 7.82 (d, *J* = 9.7 Hz, 2H), 7.71 (d, *J* = 8.9 Hz, 1H), 7.50 (d, *J* = 7.6 Hz, 3H), 7.35-7.29 (m, 4H), 7.25 (d, *J* = 7.5 Hz, 1H), 7.19-7.12 (m, 4H), 6.98 (d, *J* = 8.3 Hz, 1H), 6.11 (d, *J* = 8.9 Hz, 1H); <sup>13</sup>C NMR (100 MHz, DMSO-*d*<sub>6</sub>) δ 153.8, δ 146.9 (d, *J* = 11.7 Hz), 146.4 (d, *J* = 6.4 Hz), 146.0 (d, *J* = 8.4 Hz), 134.1, 133.8, 132.3, 132.0, 131.8 (d, *J* = 5.4 Hz), 131.7, 131.6 (d, *J* = 3.1 Hz), 130.1, 129.2, 128.7 (d, *J* = 9.9 Hz), 128.4, 127.8, 127.5 (d, *J* = 9.2 Hz), 127.0, 126.7, 126.6, 126.4, 126.2 (d, *J* = 5.0 Hz), 124.2, 124.14, 123.2, 121.2, 121.1 (d, *J* = 6.7 Hz), 121.0, 120.2, 120.1, 120.1 (d, *J* = 8.3 Hz), 119.6, 118.7, 113.2; <sup>31</sup>P NMR (161 MHz, DMSO-*d*<sub>6</sub>) δ -2.78. HRMS (ESI) calcd for [C<sub>40</sub>H<sub>35</sub>NaO<sub>5</sub>P, M+Na]<sup>+</sup>: 639.1332, Found: 639.1333.

### 3.3. Synthesis of (*S, R*)-**P6**

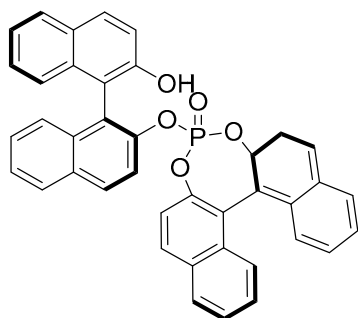

(*S, R*)-**P6**

<sup>1</sup>H NMR (400 MHz, DMSO-*d*<sub>6</sub>) δ 9.75 (s, 1H), 8.19 (t, *J* = 8.7 Hz, 2H), 8.08 (t, *J* = 7.2 Hz, 2H), 7.98 (d, *J* = 8.3 Hz, 1H), 7.87 (t, *J* = 8.8 Hz, 2H), 7.81 (d, *J* = 9.0 Hz, 1H), 7.69 (d, *J* = 8.9 Hz, 1H), 7.51 (t, *J* = 7.8 Hz, 3H), 7.43 (d, *J* = 8.9 Hz, 1H), 7.34 (t, *J* = 8.8 Hz, 4H), 7.22-7.13 (m, 3H), 7.05 (d, *J* = 8.8 Hz, 2H), 6.78 (d, *J* = 8.5 Hz, 1H), 6.47 (d, *J* = 8.9 Hz, 1H); <sup>13</sup>C NMR (100 MHz, DMSO-*d*<sub>6</sub>) δ 153.6, δ 146.9 (d, *J* = 11.7 Hz), 146.3 (d, *J* = 6.5 Hz), 145.9 (d, *J* = 8.3 Hz), 134.2, 133.7, 132.2, 131.9, 131.7 (d, *J* = 4.5 Hz), 131.6, 131.5, 130.2, 129.2 (d, *J* = 9.1 Hz), 128.7, 128.3 (d, *J* = 13.0 Hz), 127.8, 127.5 (d, *J* = 7.4 Hz), 126.7, 126.6, 126.6, 126.5, 126.2, 124.5 (d, *J* = 7.6 Hz), 124.4, 123.0, 121.0, 120.8, 120.2, 119.7, 118.7, 113.2; <sup>31</sup>P NMR (161 MHz, DMSO-*d*<sub>6</sub>) δ -2.59. HRMS (ESI) calcd for [C<sub>40</sub>H<sub>35</sub>NaO<sub>5</sub>P, M+Na]<sup>+</sup>: 639.1332, Found: 639.1328.

### 3.4. Synthesis of (*S, R*)-**P7**

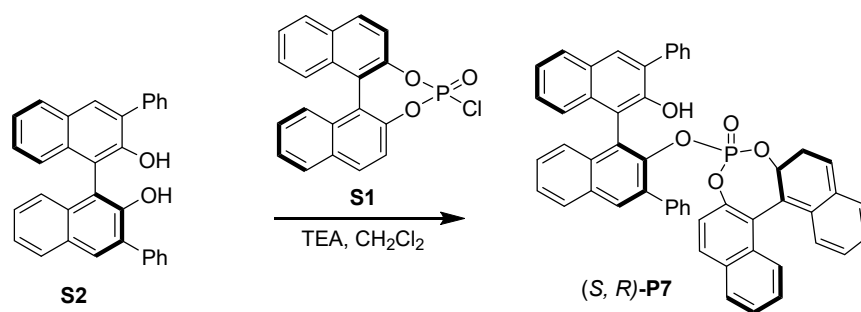

Under a nitrogen atmosphere, to a solution of **S1** (36.6 mg, 0.1 mmol) and **S2** (43.8 mg, 0.1 mmol) in anhydrous  $\text{CH}_2\text{Cl}_2$  (10 ml),  $\text{Et}_3\text{N}$  (30 mg, 0.3 mmol) was added at 0 °C. The reaction was stirred at room temperature overnight. The solvent was removed under vacuum and the residue was purified by flash column chromatography ( $\text{CH}_2\text{Cl}_2/\text{PE}$ ) to give **P7** as a white solid (616 mg, 80 % yield).  $^1\text{H}$  NMR (400 MHz,  $\text{CDCl}_3$ )  $\delta$  8.10 (t,  $J = 9.3$  Hz, 2H), 7.90 (d,  $J = 8.2$  Hz, 1H), 7.87-7.79 (m, 3H), 7.71 (d,  $J = 7.9$  Hz, 1H), 7.52 (m, 3H), 7.44-7.37 (m, 2H), 7.24 (m, 5H), 7.15 - 7.09 (m, 1H), 6.98 (m, 3H), 6.88 (d,  $J = 5.8$  Hz, 1H), 6.80 (m, 5H), 6.60-6.53 (m, 1H), 6.28 (m, 5H).  $^{13}\text{C}$  NMR (100 MHz,  $\text{CDCl}_3$ )  $\delta$  151.4, 146.3,  $\delta$  146.2 (d,  $J = 8.2$  Hz), 144.4 (d,  $J = 11.7$  Hz), 144.3, 143.5 (d,  $J = 8.9$  Hz), 143.4, 138.9, 138.6, 138.5, 138.4, 133.3, 133.0, 132.9 (d,  $J = 2.0$  Hz), 132.8, 131.1, 130.3, 129.4, 128.2, 127.9, 127.8, 127.2, 127.0, 126.8, 126.8, 126.7, 126.6, 126.5, 126.4, 125.7, 125.6, 125.6 (d,  $J = 2.2$  Hz), 125.5, 125.3, 125.1, 124.4 (d,  $J = 2.6$  Hz), 124.3, 123.7, 123.6, 1123.5 (d,  $J = 3.5$  Hz), 122.9, 122.8, 122.7, 121.6 (d,  $J = 2.0$  Hz), 121.0, 120.7 (d,  $J = 2.1$  Hz). 120.4, 119.3, 118.5, 114.7.  $^{31}\text{P}$  NMR (161 MHz,  $\text{CDCl}_3$ )  $\delta$  -0.28.

### 3.5 Synthesis of (S, R)-P8

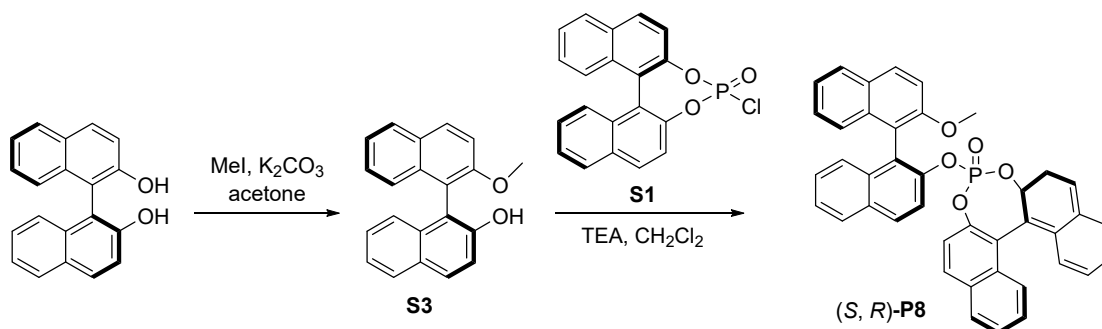

#### Preparation of S3:

The (S)-(+)-1,1'-bi-2-naphthol (1.43 g, 5 mmol) and  $\text{K}_2\text{CO}_3$  (828 mg, 6 mmol) was dissolved in dry acetone (40 ml) and MeI (775 mg, 5.5 mmol) was added dropwisely under nitrogen atmosphere at 30 °C. The slurry was stirred for 18 h under reflux. The solid was removed by filtration. The filtrate was concentrated and purified by flash column chromatography ( $\text{EtOAc}/\text{PE}$ ) to delivered product **S3** as a white solid (1.47 g, 98 % yield).  $^1\text{H}$  NMR (400 MHz,  $\text{CDCl}_3$ )  $\delta$  8.04 (d,  $J = 9.0$  Hz, 1H), 7.92-7.90 (m, 2H), 7.86 (d,  $J = 8.1$  Hz, 1H), 7.49 (d,  $J = 9.1$  Hz, 1H), 7.39-7.28 (m, 4H), 7.22 (ddd,  $J = 8.2, 6.8, 1.3$  Hz, 1H), 7.17 (d,  $J = 8.1$  Hz, 1H), 7.05 (d,  $J = 8.4$  Hz, 1H), 3.81 (s, 3H).  $^{13}\text{C}$  NMR (100 MHz,  $\text{CDCl}_3$ )  $\delta$  156.1, 151.3, 134.1, 133.9, 131.2, 129.9, 129.5, 129.3, 128.3, 128.3, 127.5, 126.5, 125.0, 124.9, 124.3, 123.4, 117.6, 115.4, 115.1, 113.9, 56.8.



### Preparation of (*S, R*)-**P8**

Under a nitrogen atmosphere, to a solution of **S1** (366 mg, 1 mmol) and **S3** (300 mg, 1 mmol) in anhydrous CH<sub>2</sub>Cl<sub>2</sub> (10 ml), Et<sub>3</sub>N (0.45 ml, 3 mmol) was added at 0 °C. The reaction was stirred at room temperature overnight. The solvent was removed under vacuum and the residue was purified by flash column chromatography (CH<sub>2</sub>Cl<sub>2</sub>/PE) to delivered product (*S, R*)-**P8** as a white solid (505 mg, 80 % yield). <sup>1</sup>H NMR (400 MHz, CDCl<sub>3</sub>) δ 7.80 (d, *J* = 9.0 Hz, 1H), 7.68 m, 3H), 7.58 (dd, *J* = 12.4, 8.2 Hz, 2H), 7.46 (m, 2H), 7.26 (d, *J* = 8.2 Hz, 2H), 7.20-7.15 (m, 2H), 7.12 (d, *J* = 7.6 Hz, 1H), 7.06-6.99 (m, 4H), 6.93 (dt, *J* = 11.7, 7.5 Hz, 4H), 6.86-6.78 (m, 2H), 6.09 (d, *J* = 8.8 Hz, 1H), 3.54 (s, 3H). <sup>13</sup>C NMR (100 MHz, CDCl<sub>3</sub>) δ 171.0, 155.0, 147.0, 146.8, 146.0, 133.8, 133.7, 132.0, 131.7, 131.6, 131.5, 131.4, 131.2, 130.6, δ 129.9 (d, *J* = 5.8 Hz), 129.8, 129.8, 128.5, 128.4, 128.3 (d, *J* = 11.1 Hz), 128.2, 128.1, 127.6, 127.1, 126.8, 126.6, 126.4, 126.3 (d, *J* = 9.7 Hz),, 126.1, 125.6 (d, *J* = 10.3 Hz), 125.5, 123.3, 121.1, 120.5, 120.4, 119.9, 119.6, 116.8, 113.3, 56.4. <sup>31</sup>P NMR (161 MHz, CDCl<sub>3</sub>) δ -2.76.

### 3.6 Synthesis of (*R, R*)-**P9**<sup>[5]</sup>

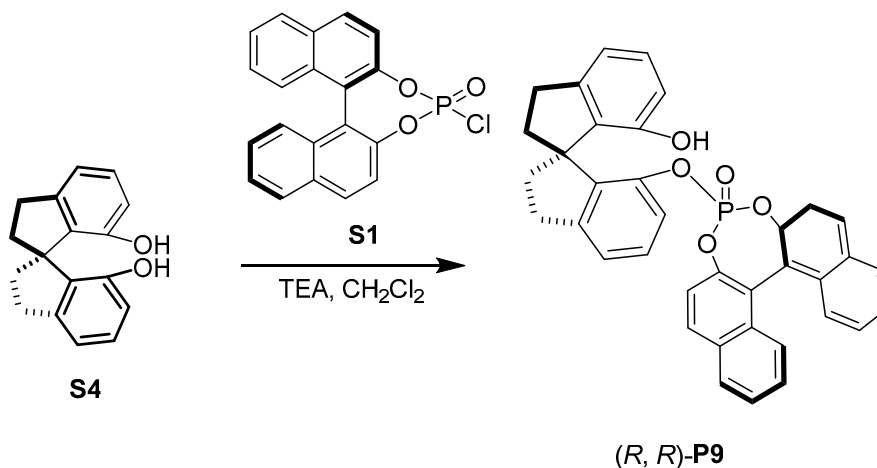

Under a nitrogen atmosphere, to a solution of **S1** (3 g, 8 mmol) and (*R*)-2,2',3,3'-tetrahydro-1,1'-spirobi[1H-indene]-7,7'-diol (**S4**, 2 g, 8mmol) in anhydrous CH<sub>2</sub>Cl<sub>2</sub> (50 ml), Et<sub>3</sub>N (1.2 mL, 8 mmol) was added at 0 °C. The reaction was stirred at room temperature overnight. The solvent was removed under vacuum and the residue was purified by flash column chromatography (CH<sub>2</sub>Cl<sub>2</sub>/PE) to delivered product **P9** as a white solid (3.3 g, 72 % yield). <sup>1</sup>H NMR (400 MHz, CDCl<sub>3</sub>) δ 8.06 (d, *J* = 9.0 Hz, 1H), 7.96 (t, *J* = 8.8 Hz, 2H), 7.91 (d, *J* = 8.9 Hz, 1H), 7.65 (d, *J* = 8.9 Hz, 1H), 7.50 (t, *J* = 7.4 Hz, 2H), 7.32 (td, *J* = 14.2, 6.1 Hz, 6H), 7.16 (d, *J* = 7.3 Hz, 1H), 6.93 (s, 2H), 6.66 (d, *J* = 8.8 Hz, 1H), 6.52 (d, *J* = 5.7 Hz, 1H), 3.14-3.01 (m, 3H), 2.93 (dd, *J* = 15.8, 8.6 Hz, 1H), 2.30 (q, *J* = 7.4, 5.0 Hz, 2H), 2.20 (dd, *J* = 12.5, 7.3 Hz, 1H), 2.06 (d, *J* = 12.1 Hz, 1H); <sup>13</sup>C NMR (100 MHz, CDCl<sub>3</sub>) δ 153.2, 147.6 (d, *J* = 1.7 Hz), 147.5 (d, *J* = 2.6 Hz), 147.3, δ146.6 (d, *J* = 8.9 Hz), 145.3, 138.1 (d, *J* = 8.5 Hz), 135.1, 132.6, 132.4, 132.3, 132.1, 131.9, 131.3, 129.0, 128.9, 128.8, 127.5, 127.4, 127.21, 127.0, 126.3, 126.2, 122.5, 117.4, 121.9 (d, *J* = 2.2 Hz), 121.1 (d, *J* = 2.1 Hz), 120.9 (d, *J* = 2.8 Hz), 120.7 (d, *J* = 3.2 Hz), 117.2, 116.2, 59.2, 38.1, 37.8, 31.6 (d, *J* = 6.2 Hz); <sup>31</sup>P NMR (162 MHz, CDCl<sub>3</sub>) δ -2.02 . HRMS (ESI) calcd for [C<sub>37</sub>H<sub>27</sub>NaO<sub>5</sub>P, M+Na]<sup>+</sup>: 605.1488,

Found: 605.1474.

### 3.7 Synthesis of (*S*, *R*)-**P10**

The (*S*, *R*)-**P10** was prepared according to the (*R*, *R*)-**P9** procedure.

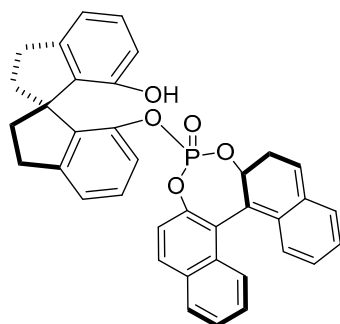

(*S*, *R*)-**P10**

$^1\text{H}$  NMR (400 MHz,  $\text{CDCl}_3$ )  $\delta$  7.97 (d,  $J = 8.9$  Hz, 1H), 7.93 - 7.87 (m, 2H), 7.83 (s, 1H), 7.45 (t,  $J = 8.1$  Hz, 3H), 7.29 (m, 6H), 7.15 (d,  $J = 7.3$  Hz, 1H), 7.00 (t,  $J = 7.7$  Hz, 1H), 6.85 (d,  $J = 8.9$  Hz, 1H), 6.59 (dd,  $J = 15.6, 7.7$  Hz, 2H), 3.03 (t,  $J = 7.3$  Hz, 2H), 2.89 (dd,  $J = 16.6, 7.6$  Hz, 1H), 2.80 (dd,  $J = 15.7, 8.6$  Hz, 1H), 2.30 (d,  $J = 9.9$  Hz, 1H), 2.21 (dt,  $J = 22.2, 7.6$  Hz, 3H);  $^{13}\text{C}$  NMR (100MHz,  $\text{CDCl}_3$ )  $\delta$  152.5, 147.4 (d,  $J = 6.7$  Hz), 147.4, 147.3 (d,  $J = 11.5$  Hz), 146.1 (d,  $J = 8.5$  Hz), 145.1, 137.8 (d,  $J = 7.3$  Hz), 134.6, 132.2, 131.9, 131.7, 131.5, 131.1, 129.2, 128.5, 128.4, 128.2, 127.3, 127.0, 126.7, 126.6, 125.8 (d,  $J = 6.1$  Hz), 122.6, 121.4 (d,  $J = 2.4$  Hz), 120.9 (d,  $J = 2.1$  Hz), 120.7 (d,  $J = 3.1$  Hz), 120.2 (d,  $J = 3.3$  Hz), 117.9, 117.4, 115.3, 58.8, 38.0, 37.8, 31.3, 31.1;  $^{31}\text{P}$  NMR (161 MHz,  $\text{CDCl}_3$ )  $\delta$  -1.91. HRMS (ESI) calcd for  $[\text{C}_{37}\text{H}_{27}\text{NaO}_5\text{P}, \text{M}+\text{Na}]^+$ : 605.1488, Found: 605.1480.

### 3.8 Synthesis of (*S*, *S*, *S*, *R*)-**P11**

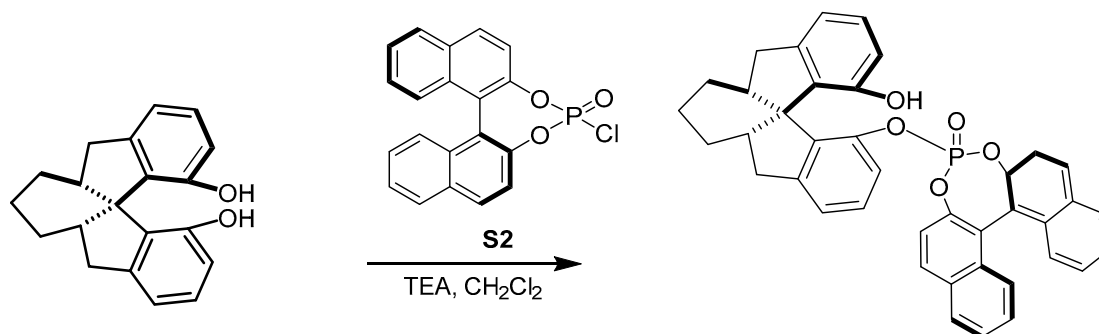

**S5**

(*S*, *S*, *S*, *S*)-**P11**

Under a nitrogen atmosphere, to a solution of **S2** (366 mg, 1 mmol) and cyclohexyl-fused chiral spirobiindanediol<sup>[6]</sup> **S5** (292 mg, 1 mmol) in anhydrous  $\text{CH}_2\text{Cl}_2$  (8 ml),  $\text{Et}_3\text{N}$  (0.15 mL, 1 mmol) was added at 0 °C. The reaction was stirred at room temperature overnight. The solvent was removed under vacuum and the residue was purified by flash column chromatography ( $\text{CH}_2\text{Cl}_2/\text{PE}$ ) to delivered product **P11** as a white solid (466 mg, 75 % yield).  $^1\text{H}$  NMR (400 MHz,  $\text{CDCl}_3$ )  $\delta$  8.01 (d,  $J = 8.9$  Hz, 1H), 7.94 (t,  $J = 7.9$  Hz, 2H), 7.85 (d,  $J = 8.9$  Hz, 1H), 7.57 (d,  $J = 8.9$  Hz, 1H), 7.53-7.43 (m, 3H), 7.30 (m, 5H), 7.16 (d,  $J = 7.4$  Hz, 1H), 7.06 (d,  $J = 8.9$  Hz, 1H), 6.87 (t,

$J = 7.6$  Hz, 1H), 6.76 (d,  $J = 7.3$  Hz, 1H), 6.35 (d,  $J = 7.9$  Hz, 1H), 3.15 (dd,  $J = 15.9$ , 7.5 Hz, 1H), 2.73 (dd,  $J = 15.5$ , 6.1 Hz, 2H), 2.65 (s, 1H), 2.57 (s, 1H), 2.29 (dd,  $J = 15.1$ , 7.6 Hz, 1H), 1.47 (m, 4H), 1.28-1.19 (m, 2H);  $^{13}\text{C}$  NMR (100 MHz,  $\text{CDCl}_3$ )  $\delta$  152.7,  $\delta$  148.3 (d,  $J = 6.6$  Hz), 147.7, 147.1 (d,  $J = 11.6$  Hz), 146.2 (d,  $J = 8.7$  Hz), 144.9, 135.7 (d,  $J = 8.1$  Hz), 133.3, 132.2 (d,  $J = 7.7$  Hz), 131.8, 131.6, 131.5, 131.1, 129.2, 128.5 (d,  $J = 8.9$  Hz), 128.0, 127.1, 126.9, 126.8 (d,  $J = 6.9$  Hz), 125.9, 123.0, 121.4 (d,  $J = 2.3$  Hz), 120.9 (d,  $J = 2.3$  Hz), 120.5 (d,  $J = 2.9$  Hz), 120.0 (d,  $J = 3.4$  Hz), 118.3, 117.2, 115.3, 61.1, 44.4, 43.0, 37.8, 36.0, 25.8, 23.5, 17.2;  $^{31}\text{P}$  NMR (161 MHz,  $\text{CDCl}_3$ )  $\delta$  -2.93. HRMS (ESI) calcd for  $[\text{C}_{40}\text{H}_{31}\text{NaO}_5\text{P}, \text{M}+\text{Na}]^+$ : 645.1801, Found: 645.1791.

#### 4. Deuteration of styrene

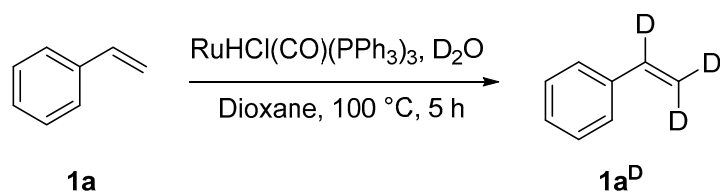

A mixture of  $\text{RuHCl(CO)(PPh}_3)_3$  (38.1 mg, 0.04 mmol, 2.0 mol%), styrene (230  $\mu\text{L}$ , 2.0 mmol) and  $\text{D}_2\text{O}$  (1 ml) in dioxane (4 mL) in a stoppered Schlenck tube was stirred and heated at 100 °C for 5 hours. The reaction mixture was cooled to room temperature and then extracted with diethyl ether. The combined organic extract was washed with water and a brine solution and dried over  $\text{MgSO}_4$ . The crude product was purified by column chromatography on silica gel using n-hexane as the eluent to give the desired product **1a<sup>D</sup>** as a colorless oil (128 mg, 60% yield). Theoretical percentage of deuteration at the vinyl position = 97%.  $^1\text{H}$  NMR (400 MHz,  $\text{CDCl}_3$ )  $\delta$  7.43-7.41 (m, 2H), 7.36-7.31 (m, 2H), 7.28-7.24 (m, 1H), 6.71 (brs, 0.03H), 5.74-5.73 (m, 0.03H), 5.23 (m, 0.03H).

#### 5. General procedure for hydroformylation

The hydroformylation reactions were conducted in a batch reactor (Shanghai Yanzheng). In a typical run, 0.001 mmol of chloro(1,5-cyclooctadiene)rhodium(I) dimer, 0.006 mmol of ligand ( $\text{Rh/L} = 1:3$ ) was dissolved in 25 mL toluene. and then the solution of substrate (3.0 mmol) was added. After that, the reactor was charged with 4.0 MPa syngas ( $\text{CO/H}_2 = 1:1$ ) for 12-48 h at 30 °C. The products were analyzed with GC and GC-MS. The yield and the regioselectivity of aldehydes were identified by GC. The mixture was concentrated under reduced pressure. Then the crude product was purified by flash chromatography on silica gel to give the desired aldehyde.

## 6. Characterization data of *rac*- $\alpha$ -aryl propionaldehydes<sup>[7-16]</sup>

### 2-(2-Fluorophenyl)propanal (2b)

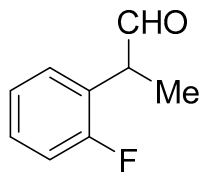

Colorless oil, 94% yield.  $^1\text{H}$  NMR (400 MHz,  $\text{CDCl}_3$ )  $\delta$  9.67 (d,  $J = 0.7$  Hz, 1H), 7.22 (m, 1H), 7.11-7.01 (m, 3H), 3.84 (q,  $J = 7.1$  Hz, 1H), 1.38 (d,  $J = 7.2$  Hz, 3H).

### 2-(3-Fluorophenyl)propanal (2c)

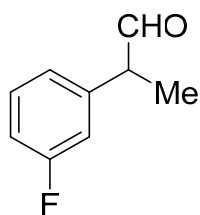

Colorless oil, 94% yield.  $^1\text{H}$  NMR (400 MHz,  $\text{CDCl}_3$ )  $\delta$  9.56 (d,  $J = 1.4$  Hz, 1H), 7.27-7.21 (m, 1H), 6.92-6.87 (m, 2H), 6.85-6.81 (m, 1H), 3.54 (q,  $J = 6.4$  Hz, 1H), 1.34 (d,  $J = 7.1$  Hz, 3H).

### 2-(4-fluorophenyl)propanal (2d)

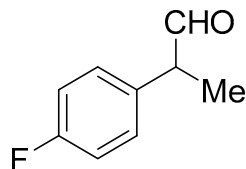

Colorless oil, 93% yield.  $^1\text{H}$  NMR (400 MHz,  $\text{CDCl}_3$ )  $\delta$  9.67 (d,  $J = 1.3$  Hz, 1H), 7.38-7.34 (m, 2H), 7.18-7.14 (m, 2H), 3.64 (q,  $J = 6.7$  Hz, 1H), 1.45 (d,  $J = 7.1$  Hz, 3H).

### 2-(2-chlorophenyl)propanal (2e)

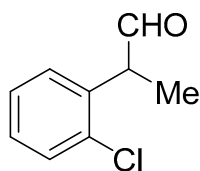

Colorless oil, 95% yield.  $^1\text{H}$  NMR (400 MHz,  $\text{CDCl}_3$ )  $\delta$  9.72 (s, 1H), 7.44 (dd,  $J = 7.5$ , 1.8 Hz, 1H), 7.31-7.22 (m, 2H), 7.14 (dd,  $J = 7.3$ , 2.1 Hz, 1H), 4.14 (q,  $J = 7.1$  Hz, 1H), 1.44 (d,  $J = 7.1$  Hz, 3H).

### 2-(3-chlorophenyl)propanal (2f)

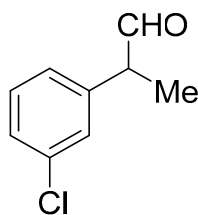

Colorless oil, 94% yield.  $^1\text{H}$  NMR (400 MHz,  $\text{CDCl}_3$ )  $\delta$  9.68 (d,  $J = 1.3$  Hz, 1H), 7.35-7.28 (m, 2H), 7.23 (d,  $J = 1.9$  Hz, 1H), 7.11 (m, 1H), 3.64 (q,  $J = 6.7$  Hz, 1H), 1.46 (d,  $J = 7.1$  Hz, 3H).

### 2-(4-Chlorophenyl)propanal (2g)

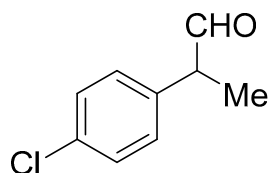

Colorless oil, 93% yield.  $^1\text{H}$  NMR (400 MHz,  $\text{CDCl}_3$ )  $\delta$  9.64 (d,  $J = 1.3$  Hz, 1H), 7.36-7.31 (m, 2H), 7.16-7.12 (m, 2H), 3.62 (q,  $J = 7.1$  Hz, 1H), 1.42 (d,  $J = 7.1$  Hz, 3H).

### 2-(2-bromophenyl)propanal (2h)

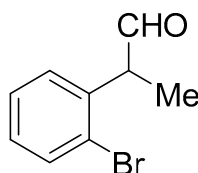

Colorless oil, 91% yield.  $^1\text{H}$  NMR (400 MHz,  $\text{CDCl}_3$ )  $\delta$  9.65 (s, 1H), 7.55 (dd,  $J = 8.0$ , 1.3 Hz, 1H), 7.27-7.22 (m, 1H), 7.09 (m, 1H), 7.03 (dd,  $J = 7.7$ , 1.7 Hz, 1H), 4.08 (q,  $J = 7.1$  Hz, 1H), 1.34 (d,  $J = 7.1$  Hz, 3H).

### 2-(3-bromophenyl)propanal (2i)

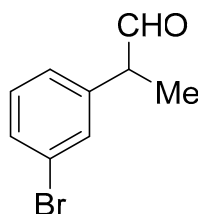

Colorless oil, 94% yield.  $^1\text{H}$  NMR (400 MHz,  $\text{CDCl}_3$ )  $\delta$  9.50 (d,  $J = 1.3$  Hz, 1H), 7.29-7.23 (m, 2H), 7.10 (t,  $J = 7.8$  Hz, 1H), 7.00 (m, 1H), 3.47 (q,  $J = 7.1$ , 6.4 Hz, 1H), 1.28 (d,  $J = 7.1$  Hz, 3H).

### 2-(4-bromophenyl)propanal (2j)

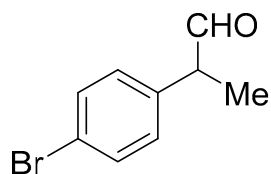

Colorless oil, 93% yield.  $^1\text{H}$  NMR (400 MHz,  $\text{CDCl}_3$ )  $\delta$  9.66 (d,  $J = 1.3$  Hz, 1H), 7.53-7.47 (m, 2H), 7.12-7.05 (m, 2H), 3.62 (q,  $J = 7.1, 6.7$  Hz, 1H), 1.44 (d,  $J = 7.1$  Hz, 3H).

### 2-(4-nitrophenyl)propanal (2k)

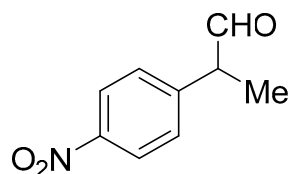

Yellow solid, m.p. 39.5-40.1 °C, 94% yield.  $^1\text{H}$  NMR (400 MHz,  $\text{CDCl}_3$ )  $\delta$  9.65 (d,  $J = 1.1$  Hz, 1H), 8.17 (d,  $J = 8.7$  Hz, 2H), 7.33 (d,  $J = 8.7$  Hz, 2H), 3.73 (q,  $J = 7.1$  Hz, 1H), 1.45 (d,  $J = 7.2$  Hz, 3H).

### 2-(*o*-Tolyl)propanal (2l)

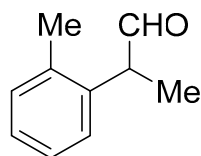

Colorless oil, 92% yield.  $^1\text{H}$  NMR (400 MHz,  $\text{CDCl}_3$ )  $\delta$  9.52 (s, 1H), 7.12-7.06 (m, 3H), 6.92 (d,  $J = 6.4$  Hz, 1H), 3.72 (q,  $J = 7.0$  Hz, 1H), 2.24 (s, 3H), 1.29 (d,  $J = 8.3$  Hz, 3H).

### 2-(*m*-Tolyl)propanal (2m)

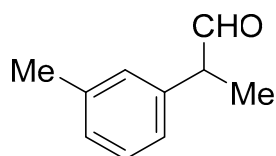

Colorless oil, 92% yield.  $^1\text{H}$  NMR (400 MHz,  $\text{CDCl}_3$ )  $\delta$  9.59 (d,  $J = 1.0$  Hz, 1H), 7.18 (t,  $J = 7.9$  Hz, 1H), 7.03 (d,  $J = 7.5$  Hz, 1H), 6.92 (d,  $J = 6.6$  Hz, 2H), 3.51 (q,  $J = 7.0$  Hz, 1H), 2.27 (s, 3H), 1.34 (d,  $J = 7.1$  Hz, 3H).

### 2-(*p*-Tolyl)propanal (2n)

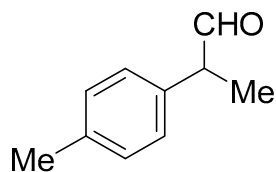

Colorless oil, 92% yield.  $^1\text{H}$  NMR (400 MHz,  $\text{CDCl}_3$ )  $\delta$  9.66 (d,  $J = 1.3$  Hz, 1H), 7.20 (d,  $J = 7.9$  Hz, 2H), 7.10 (d,  $J = 8.0$  Hz, 2H), 3.60 (q,  $J = 6.9$  Hz, 1H), 2.35 (s, 3H), 1.42 (d,  $J = 7.1$  Hz, 3H).

#### 2-(4-*iso*-Butylphenyl)propanal (2o)

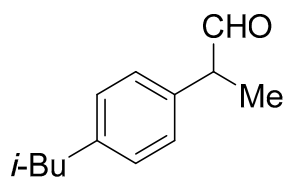

Colorless oil, 92% yield.  $^1\text{H}$  NMR (400 MHz,  $\text{CDCl}_3$ )  $\delta$  9.55 (d,  $J = 1.4$  Hz, 1H), 7.06-6.98 (m, 4H), 3.49 (q,  $J = 6.1$  Hz, 1H), 2.36 (d,  $J = 7.2$  Hz, 2H), 1.75 (m, 1H), 1.31 (d,  $J = 7.1$  Hz, 3H), 0.80 (d,  $J = 6.6$  Hz, 6H).

#### 2-(4-(*tert*-Butyl)phenyl)propanal (2p)

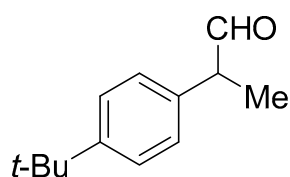

Colorless oil, 88% yield.  $^1\text{H}$  NMR (400 MHz,  $\text{CDCl}_3$ )  $\delta$  9.71 (d,  $J = 1.3$  Hz, 1H), 7.44 (d,  $J = 8.3$  Hz, 2H), 7.19 (d,  $J = 8.2$  Hz, 2H), 3.65 (q,  $J = 7.0$  Hz, 1H), 1.47 (d,  $J = 7.1$  Hz, 3H), 1.36 (s, 9H).

#### 2-(4-Hydroxyphenyl)propanal (2q)

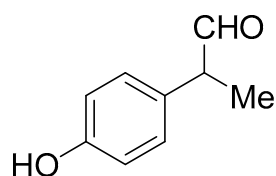

Colorless oil, 92% yield.  $^1\text{H}$  NMR (400 MHz,  $\text{CDCl}_3$ )  $\delta$  9.53 (d,  $J = 1.0$  Hz, 1H), 6.96 (d,  $J = 8.4$  Hz, 2H), 6.77 (d,  $J = 8.4$  Hz, 2H), 6.57 (s, 1H), 3.50 (q,  $J = 6.8$  Hz, 1H), 1.31 (d,  $J = 7.1$  Hz, 3H).

#### 2-(4-Methoxyphenyl)propanal (2r)



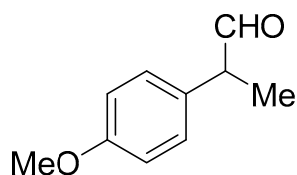

Colorless oil, 91% yield.  $^1\text{H}$  NMR (400 MHz,  $\text{CDCl}_3$ )  $\delta$  9.53 (d,  $J = 1.4$  Hz, 1H), 7.05-7.00 (m, 2H), 6.84-6.79 (m, 2H), 3.69 (s, 3H), 3.48 (q,  $J = 7.1$  Hz, 1H).

### 2-(2,5-dimethylphenyl)propanal (2s)

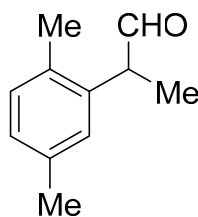

Colorless oil, 91% yield.  $^1\text{H}$  NMR (400 MHz,  $\text{CDCl}_3$ )  $\delta$  9.71 (d,  $J = 1.1$  Hz, 1H), 7.19 (d,  $J = 7.7$  Hz, 1H), 7.08 (d,  $J = 9.1$  Hz, 1H), 6.92 (s, 1H), 3.91-3.84 (m, 1H), 2.39 (s, 3H), 2.38 (s, 3H), 1.46 (d,  $J = 7.0$  Hz, 3H).

### 2-(3,4-dimethoxyphenyl)propanal (2t)

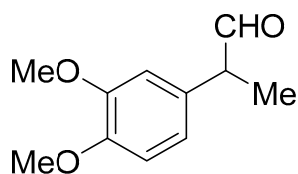

Colorless oil, 89% yield.  $^1\text{H}$  NMR (400 MHz,  $\text{CDCl}_3$ )  $\delta$  9.54 (d,  $J = 1.4$  Hz, 1H), 6.78 (d,  $J = 8.2$  Hz, 1H), 6.66 (dd,  $J = 8.2, 2.0$  Hz, 1H), 6.60 (d,  $J = 2.0$  Hz, 1H), 3.77 (s, 3H), 3.77 (s, 3H), 3.51-3.44 (m, 1H), 1.32 (d,  $J = 7.1$  Hz, 3H).

### 2-(naphthalen-2-yl)propanal (2u)

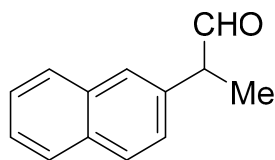

White solid, m.p. 87.0-88.2  $^{\circ}\text{C}$ , 92% yield.  $^1\text{H}$  NMR (400 MHz,  $\text{CDCl}_3$ )  $\delta$  9.80 (d,  $J = 1.4$  Hz, 1H), 7.92-7.86 (m, 3H), 7.72 (s, 1H), 7.60-7.51 (m, 2H), 7.36 (dd,  $J = 8.4, 1.8$  Hz, 1H), 3.82 (q,  $J = 6.6$  Hz, 1H), 1.59 (d,  $J = 7.1$  Hz, 3H).

## 7. Isotope Effect Measurements.

**Scheme S1** Competition Isotope Effect of deuterated styrene.

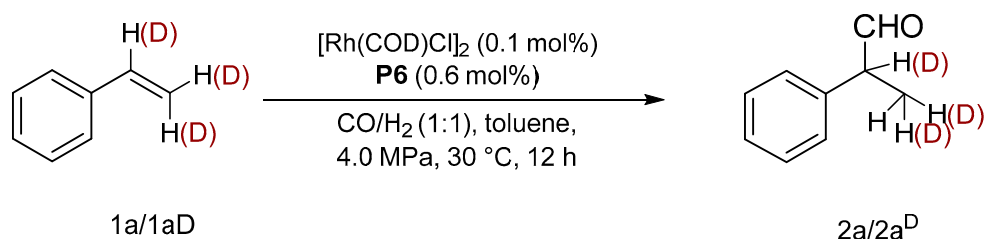

The Competition Isotope Effect was calculated using the following equation<sup>17, 18</sup>:

$$(1-F_H) = \chi_t^{2a} (1-F_{tot}) / \chi_0^{1a}$$

$$k_H/k_D = \ln(1-F_H) / \ln[R(1-F_H)/R_0]$$

where  $F_{tot}$  represent the total conversion;  $F_H$  represent fractional conversion of protiated starting material;  $R_0$  and  $R$  represent the extent of deuterium incorporation in the starting material prior to and following the reaction, respectively;  $\chi_0$  and  $\chi_t$  represent initial and final mole fraction, respectively.

**Table S2** Competition isotope effect of deuterated styrene.<sup>a</sup>

| $\chi_0^{1a}$ | $\chi_0^{1aD}$ | $R_0$ | $\chi_t^{2a}$ | $\chi_t^{2aD}$ | $R$  | $R/R_0$ | $1-F_{tot}$ | $1-F_H$ | $k_H/k_D$ |
|---------------|----------------|-------|---------------|----------------|------|---------|-------------|---------|-----------|
| 0.55          | 0.45           | 1.22  | 0.66          | 0.34           | 1.94 | 1.59    | 0.45        | 0.28    | 1.57      |

<sup>a</sup> Deuterated product ratio was determined from integration of the <sup>1</sup>H NMR signals.

**Scheme S2** Competition isotope effect under H<sub>2</sub>/D<sub>2</sub> atmosphere.<sup>a</sup>

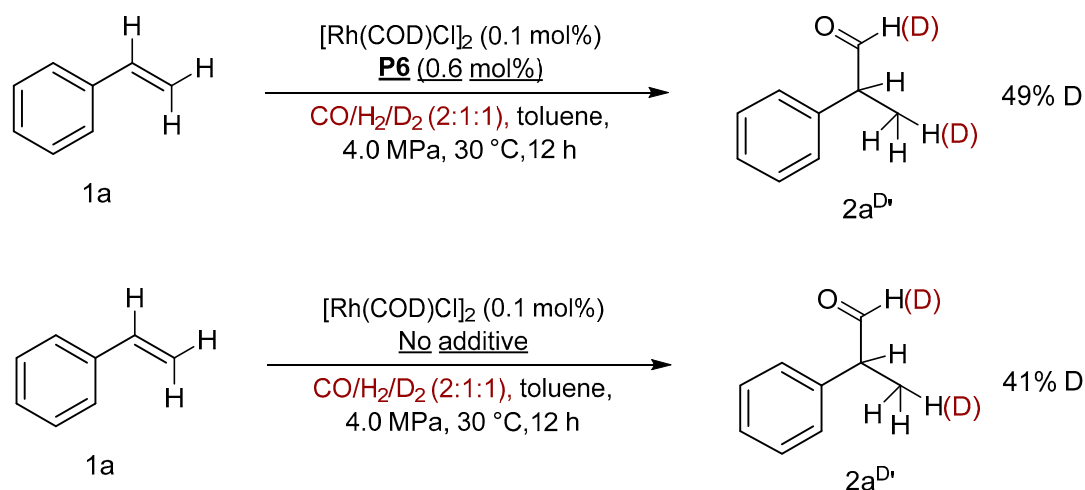

<sup>a</sup> Deuterated product ratio was determined from integration of the <sup>1</sup>H NMR signals.

## 8. References

- [1] A. Ngo Ndimba, T. Roisnel, G. Argourch, C. Lalli, *Synthesis*, **2019**, *51*, 865-873.
- [2] V. Grushin, *Chem. Rev.* **2004**, *104*, 1629-1662.
- [3] B. Q. Gong, W. Y. Chen, B. F. Hu, *J. Org. Chem.* **1991**, *56*, 423-425.
- [4] J. G. An, J. M. Wilson, Y. Z. An, D. F. Wiemer, *J. Org. Chem.* **1996**, *61*, 4040-4045.
- [5] B. Xu, S. F. Zhu, X. L. Xie, J. J. Shen, Q. L. Zhou, *Angew. Chem. Int. Ed.* **2011**, *50*, 11483-11486.
- [6] Z. Y. Zheng, Y. X. Cao, Q. L. Chong, Z. B. Han, J. M. Ding, C. G. Luo, Z. Wang, D. S. Zhu, Q. L. Zhou, K. L. Ding, *J. Am. Chem. Soc.* **2018**, *140*, 10374-10381.
- [7] R. Witten, N. Jacobsen, *Org. Lett.* **2015**, *17*, 2772-2775.
- [8] R. Tanaka, K. Nakano, K. Nozaki, *J. Org. Chem.* **2007**, *72*, 8671-8676.
- [9] J. Zhang, C. Liu, G. Wang, Z. Chen, F. Zhang, B. Zhang, *Chem. Commun.* **2018**, *54*, 6204.
- [10] H. Kikuchi, K. Kogure, M. Toyoda. *Chemistry Letters*. **1984**, 341-344.
- [11] S. Kasinathan, L. Bourne, P. Tolstoy, P. Koos, Matthew. Brien, W. Bates, R. Baxendale, V. Ley, *Synlett*. **2011**, *18*, 2648-2651.
- [12] B. List, I. Čorić, O. Grygorenko, J. Kaib, I. Komarov, A. Lee, M. Leutzsch, S. Chandra, V. Tymtsunik, V. Gemmeren. *Angew. Chem. Int. Ed.* **2014**, *53*, 282-285.
- [13] J. Zhang, W. Schuppe, T. Pan, X. Chen, R. Wang, R. Newhouse, L. Yin. *J. Am. Chem. Soc.* **2018**, *140*, 5300-5310.
- [14] A. Reziq, H. Alper, S. Wang, L. Post, *J. Am. Chem. Soc.* **2006**, *128*, 5279-5282.
- [15] L. Zhang, Z. Zuo, X. Wan, Z. Huang, *J. Am. Chem. Soc.* **2014**, *136*, 15501-15004.
- [16] J. Fried, *J. Med. Chem.* **1970**, *13*, 203-205.
- [17] L. C. S. Melander; W. H. Saunders, *Reaction Rates of Isotopic Molecules*; Wiley: New York, **1980**; p 102.
- [18] D. A. Singleton; A. A. Thomas, *J. Am. Chem. Soc.* **1995**, *117*, 9357-9358.

## 9. IR spectra

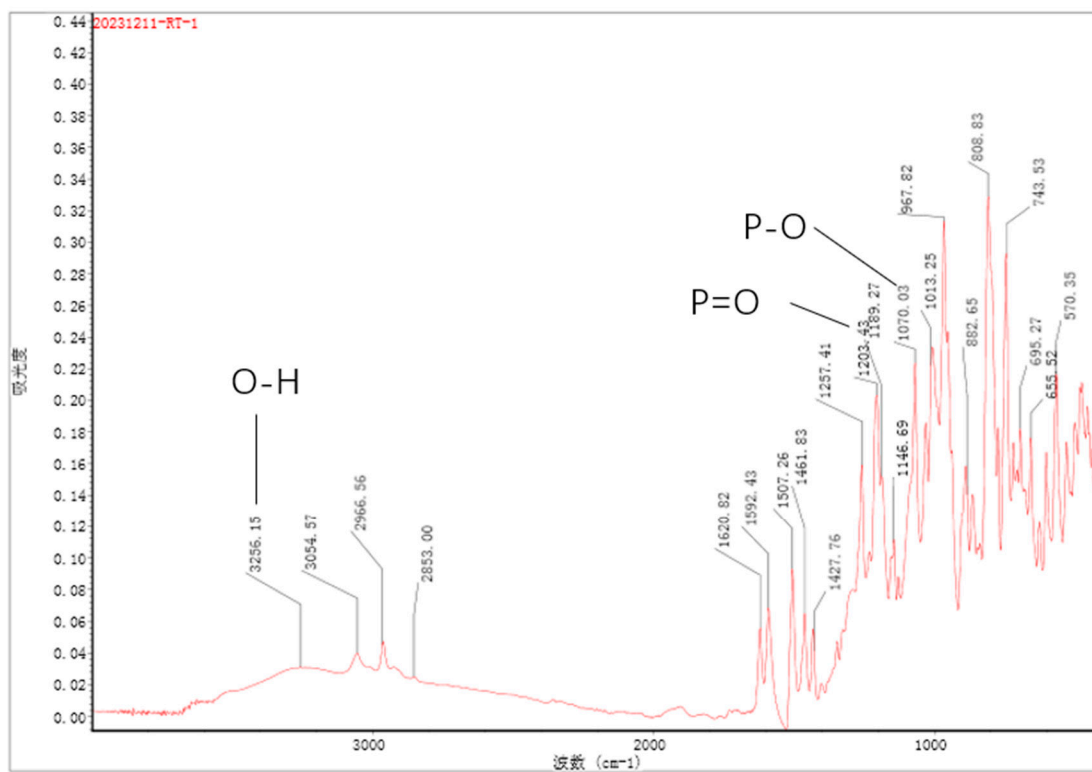

Fig. S4 IR spectrum of P6

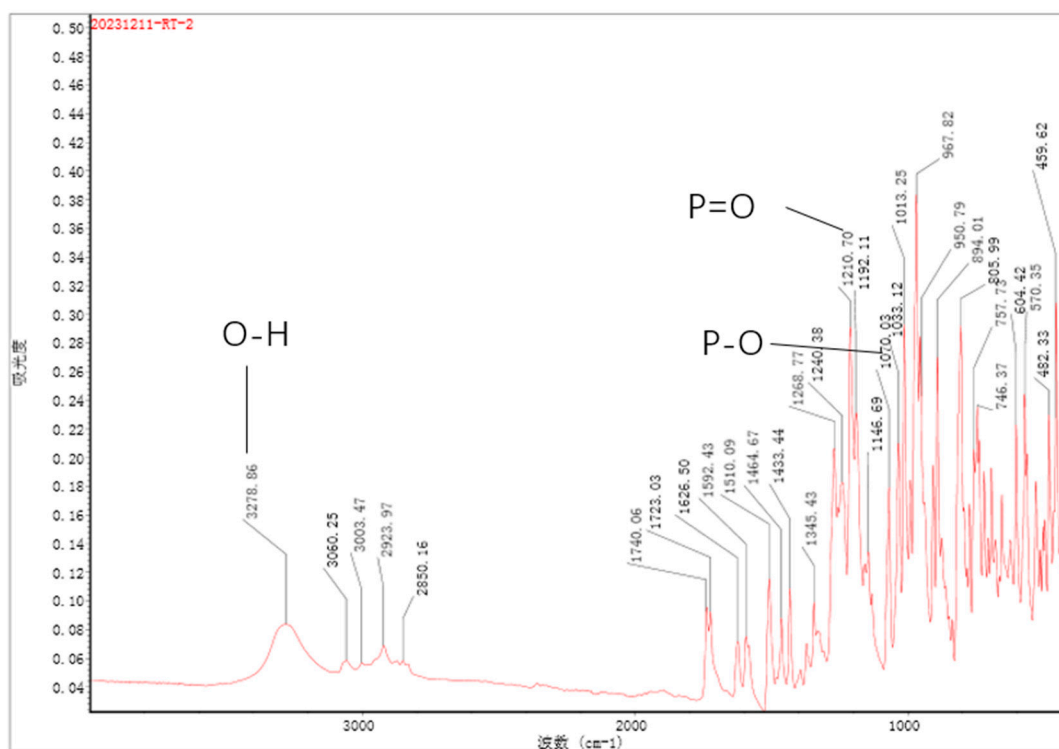

Fig. S5 IR spectrum of P6/[Rh] = 1/1

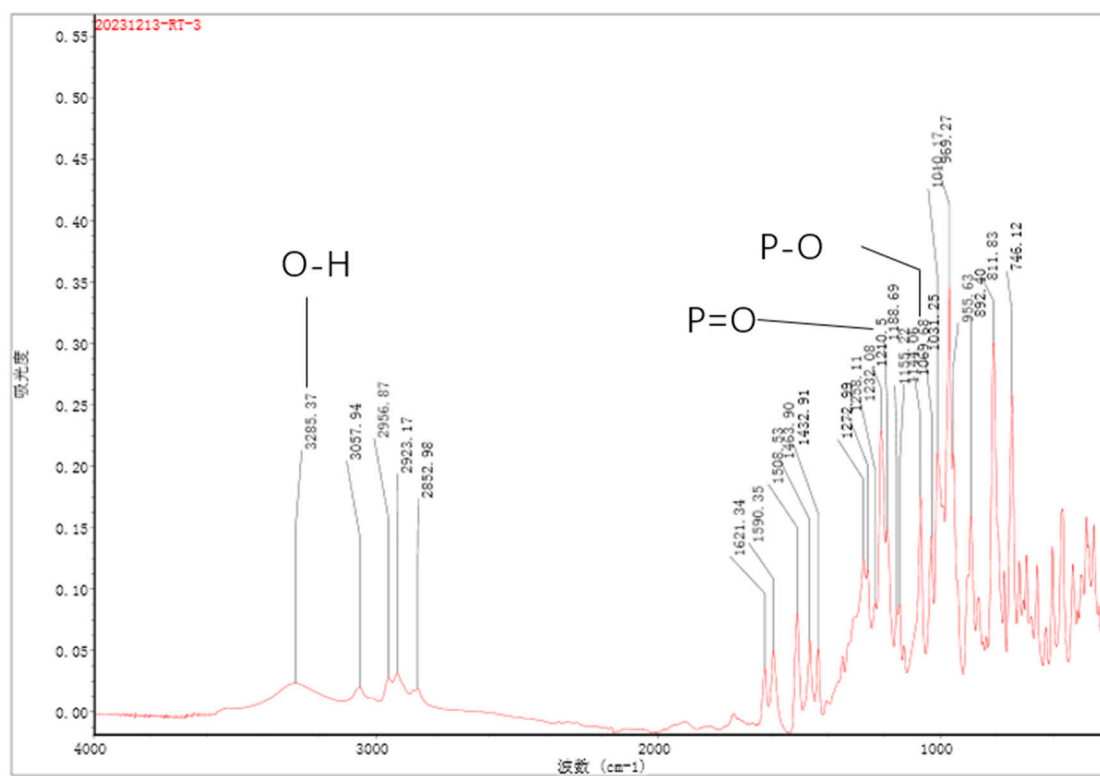

**Fig. S6** IR spectrum of **P6**/[Rh] = 2:1

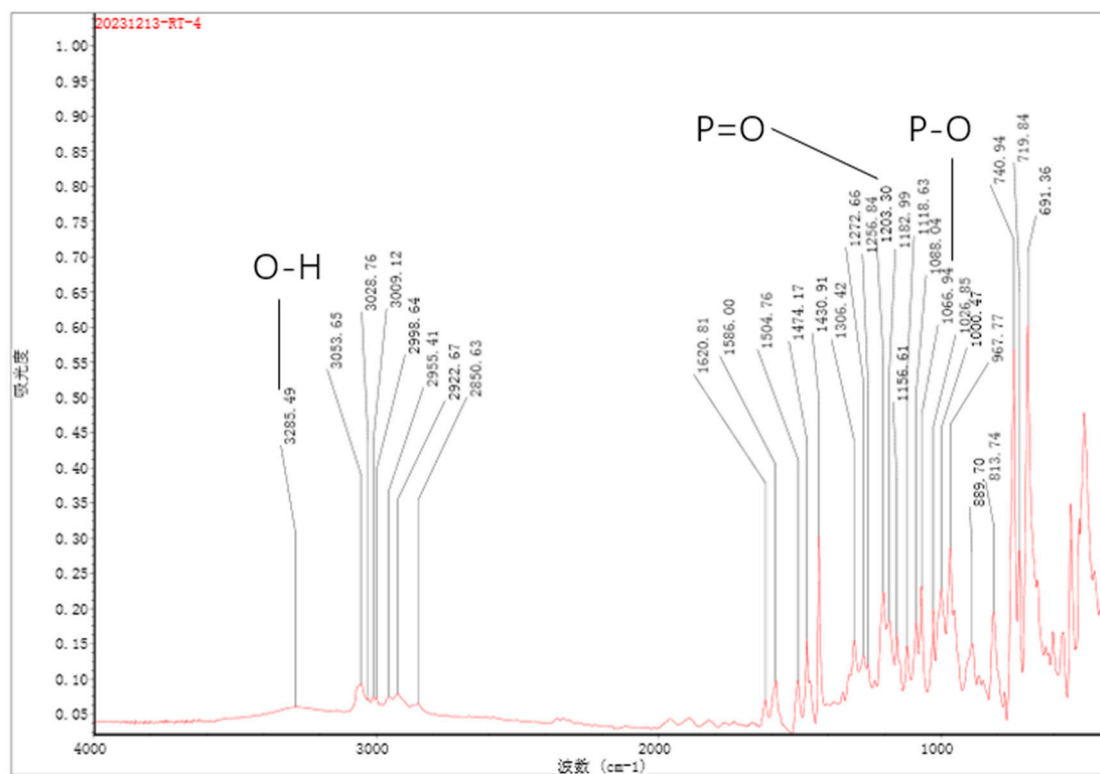

**Fig. S7** IR spectrum of **P6**/[Rh]/PPh<sub>3</sub> = 1:1:2

## 10. NMR Spectra

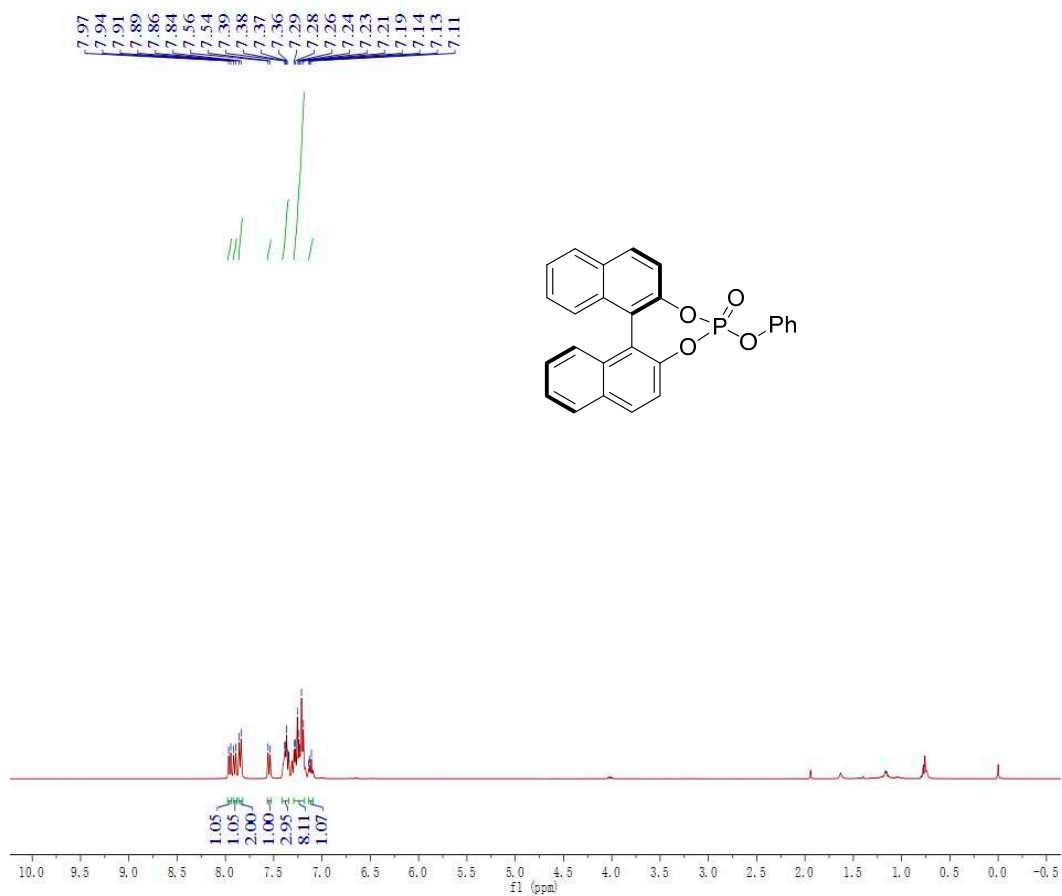

**Fig. S8** <sup>1</sup>H-NMR spectrum of (*R*)-P4 (400 MHz, CDCl<sub>3</sub>)

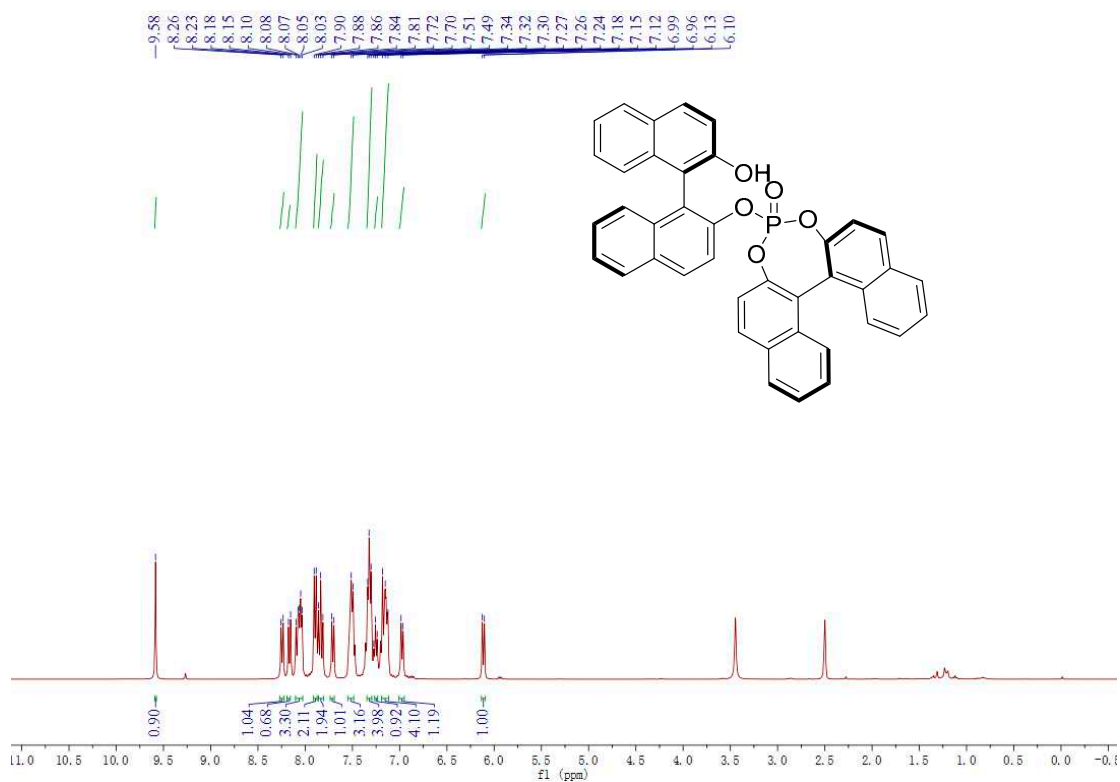

**Fig. S9** <sup>1</sup>H-NMR spectrum of (*R,R*)-P5 (400 MHz, DMSO-*d*<sub>6</sub>)

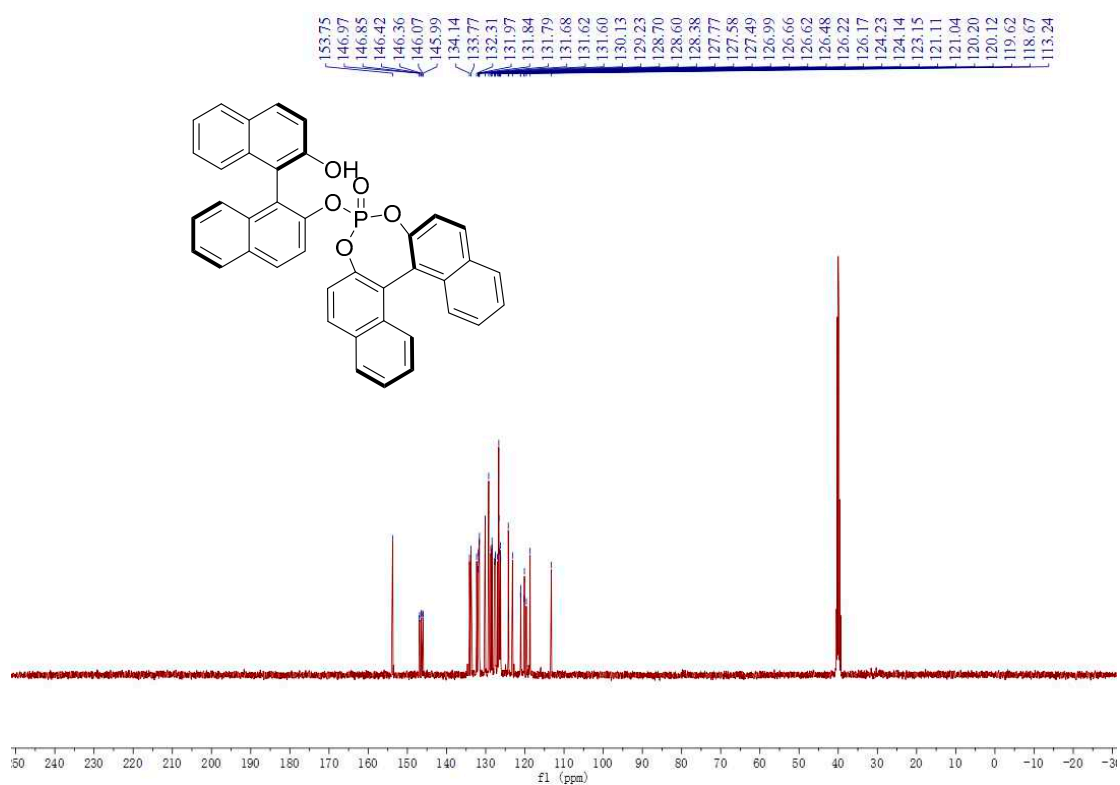

**Fig. S10**  $^{13}\text{C}$ -NMR spectrum of *(R, R)*-P5 (100 MHz, DMSO- $d_6$ )

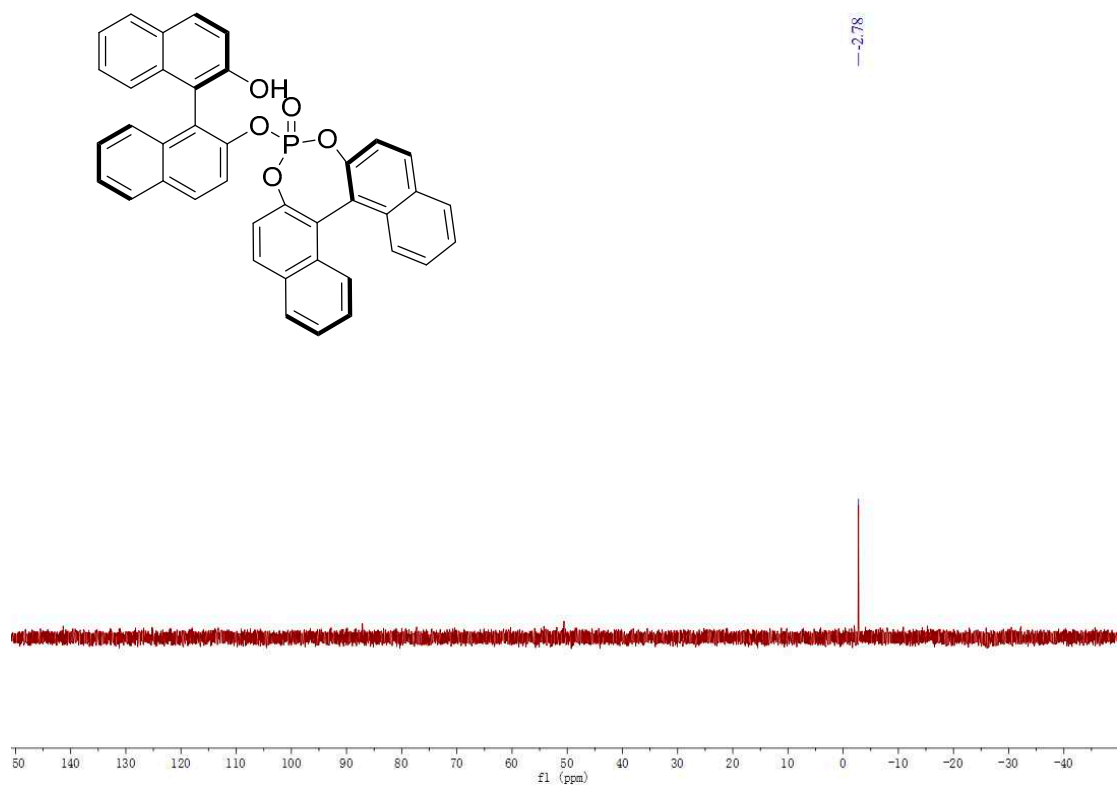

**Fig. S11**  $^{31}\text{P}$ -NMR spectrum of *(R, R)*-P5 (161 MHz, DMSO- $d_6$ )

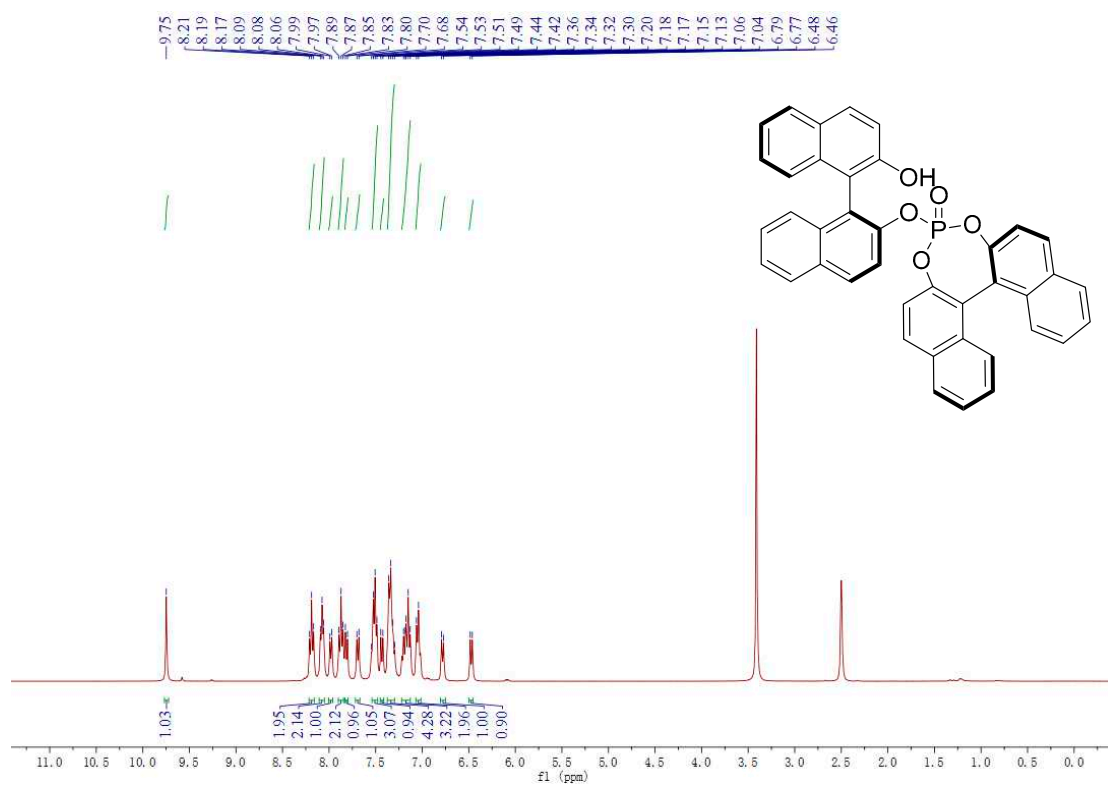

**Fig. S12** <sup>1</sup>H-NMR spectrum of (*S*, *R*)-P6 (400 MHz, DMSO-*d*<sub>6</sub>)

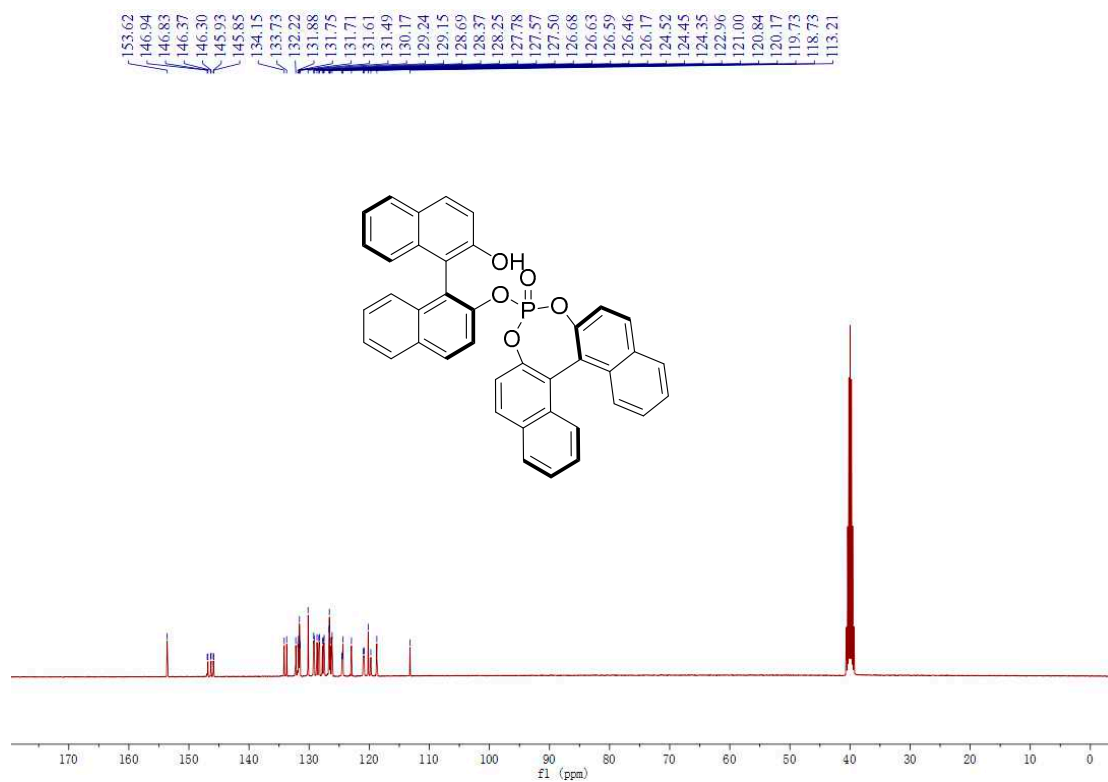

**Fig. S13** <sup>13</sup>C-NMR spectrum of (*S*, *R*)-P6 (100 MHz, DMSO-*d*<sub>6</sub>)



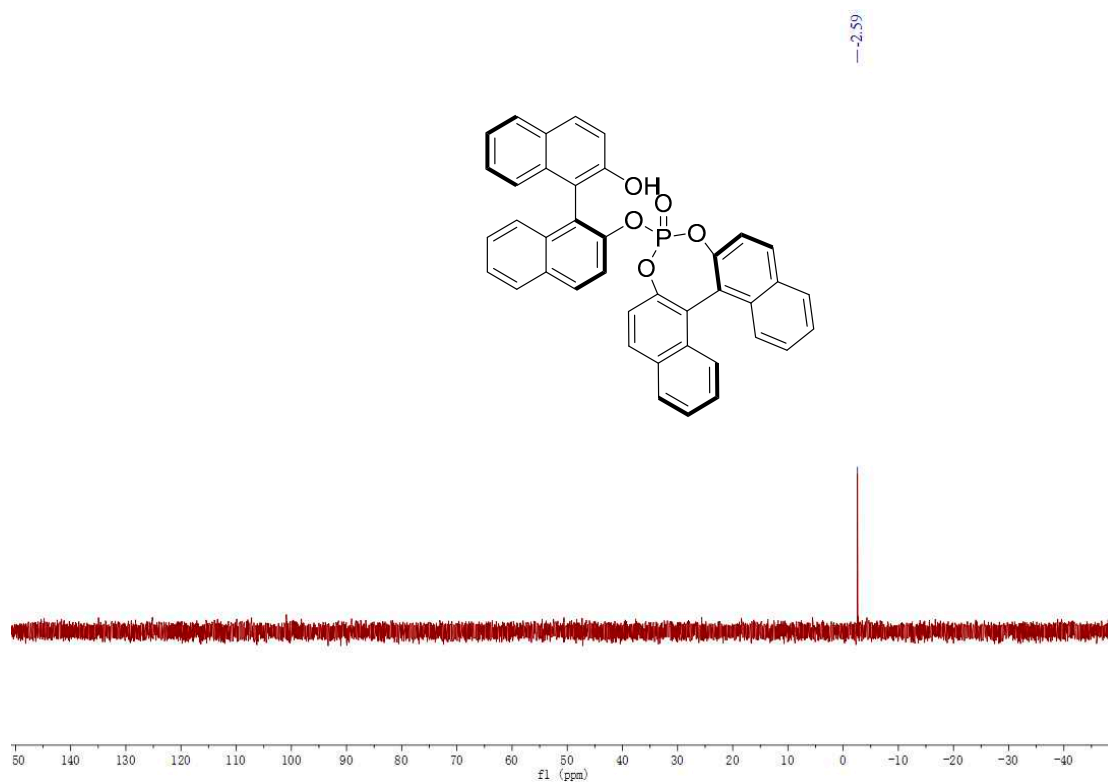

**Fig. S14**  $^{31}\text{P}$ -NMR spectrum of *(S, R)*-P6 (161 MHz,  $\text{DMSO}-d_6$ )

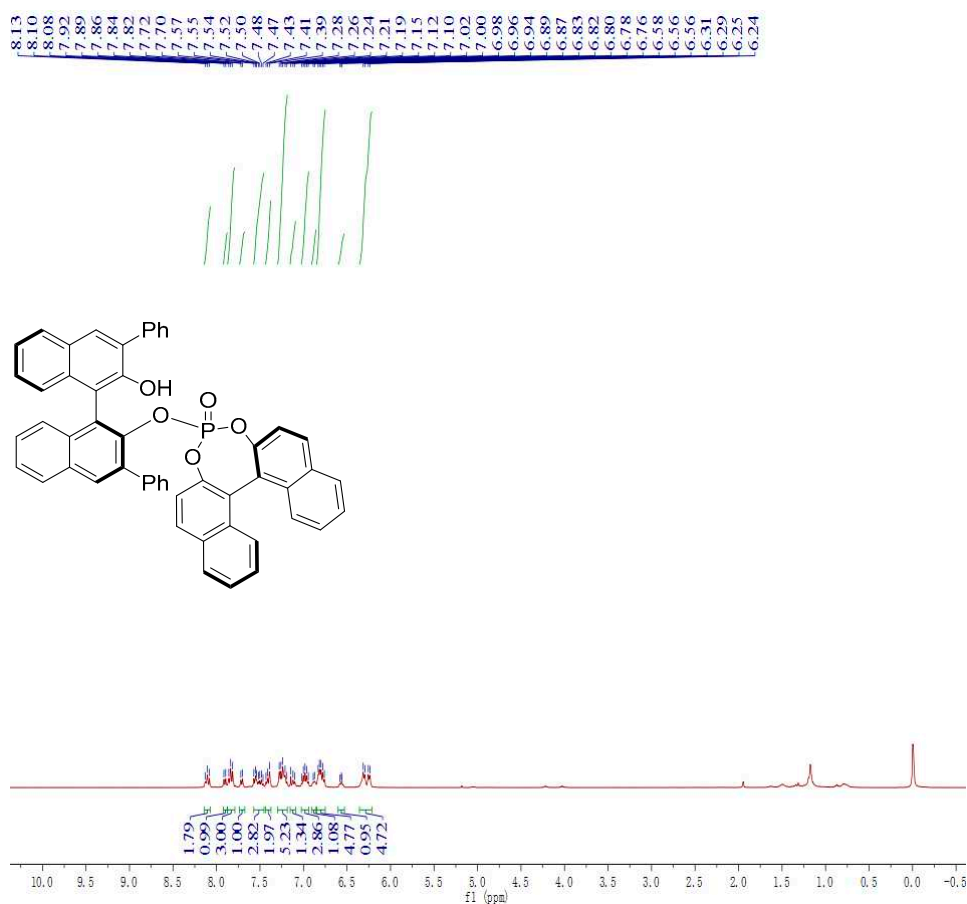

**Fig. S15**  $^1\text{H}$ -NMR spectrum of *(S, R)*-P7 (400 MHz,  $\text{CDCl}_3$ )

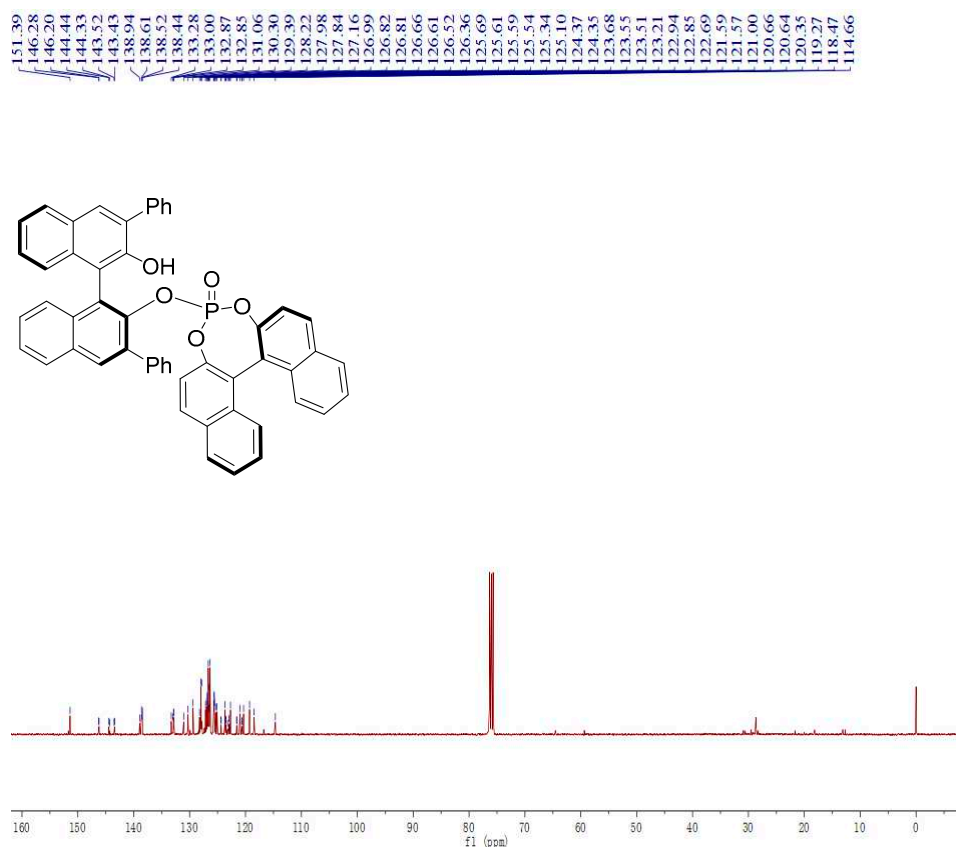

**Fig. S16**  $^{13}\text{C}$ -NMR spectrum of *(S, R)*-P7 (100 MHz,  $\text{CDCl}_3$ )

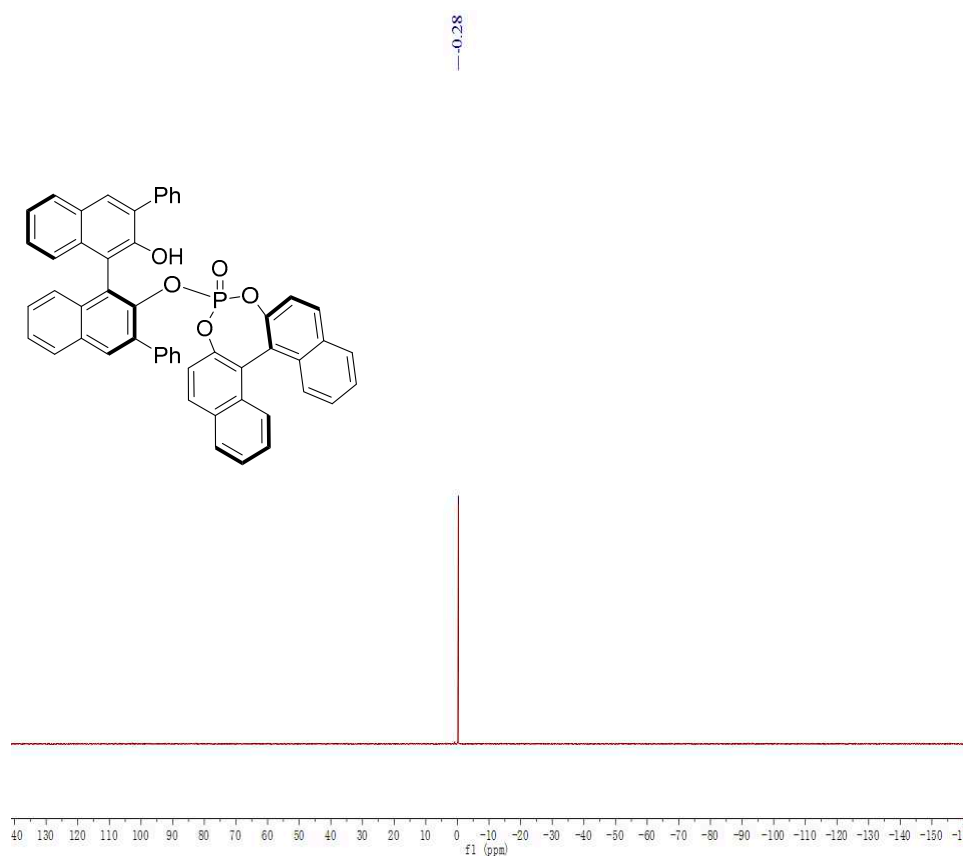

**Fig. S17**  $^{31}\text{P}$ -NMR spectrum of *(S, R)*-P7 (161 MHz,  $\text{CDCl}_3$ )

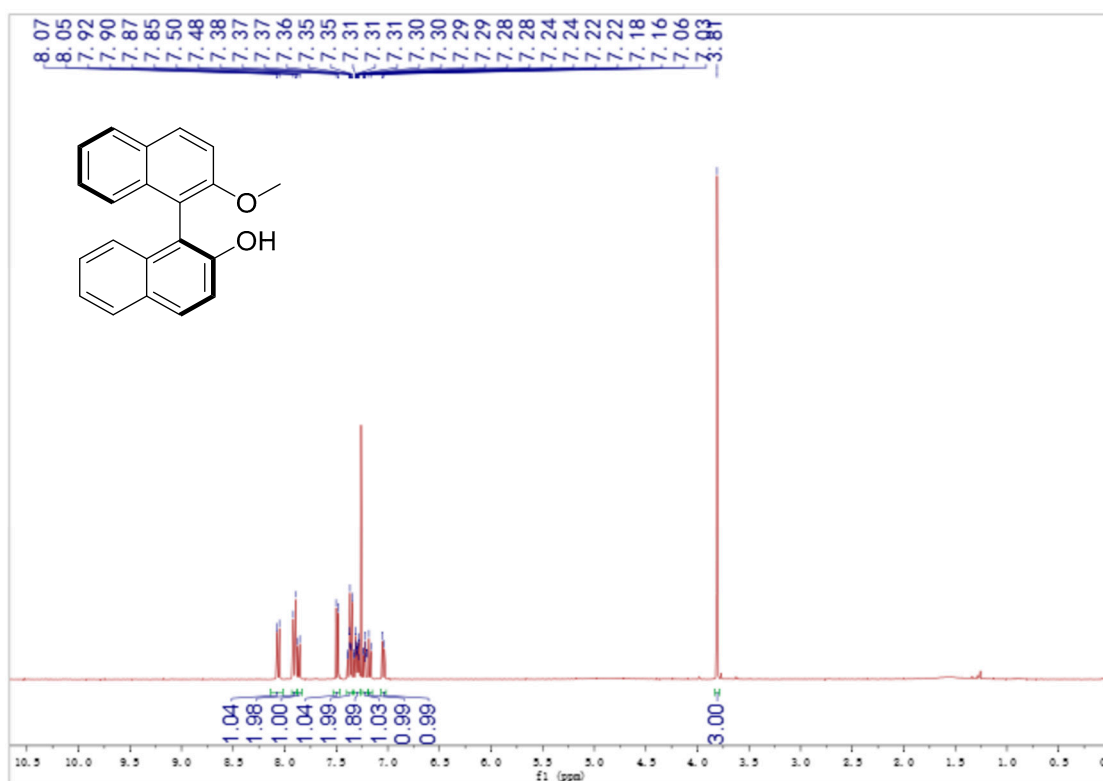

**Fig. S18** <sup>1</sup>H-NMR spectrum of S3 (400 MHz, CDCl<sub>3</sub>)

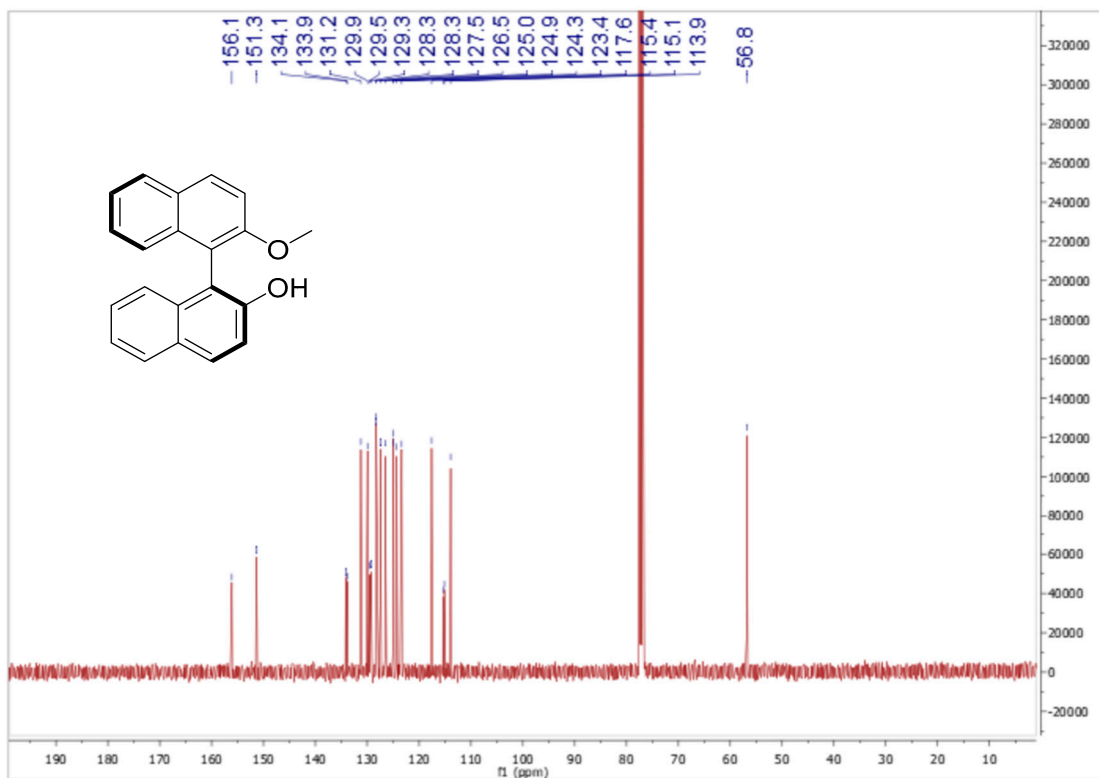

**Fig. S19** <sup>13</sup>C-NMR spectrum of S3 (100 MHz, CDCl<sub>3</sub>)

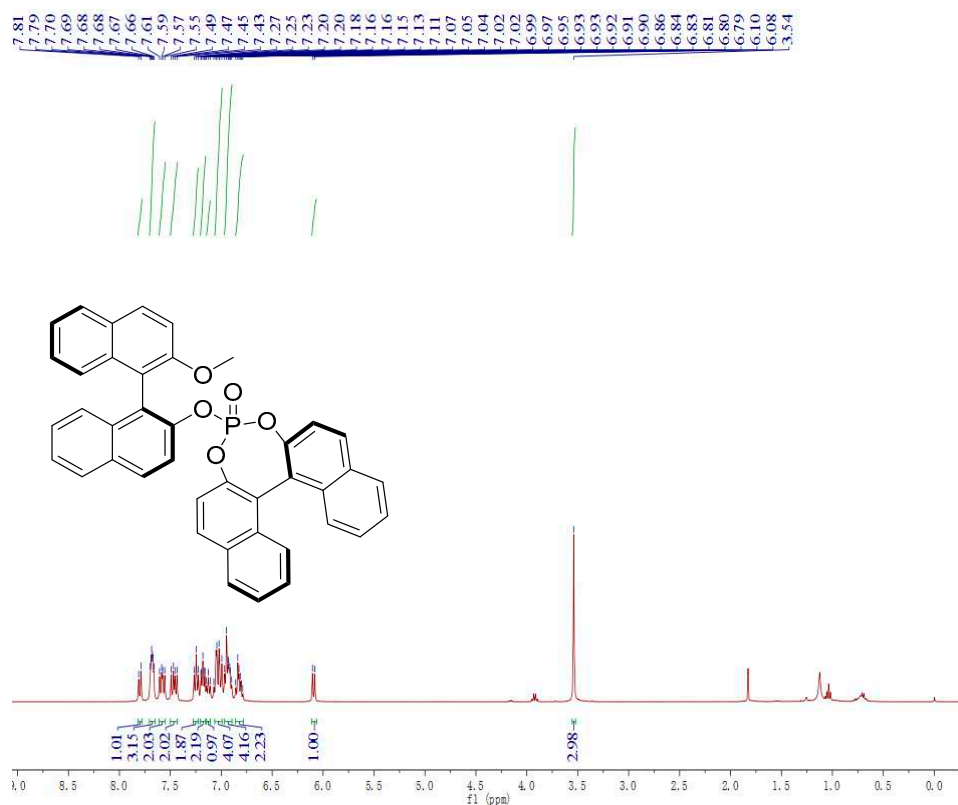

**Fig. S20** <sup>1</sup>H-NMR spectrum of (*S, R*)-**P8** (400 MHz, CDCl<sub>3</sub>)

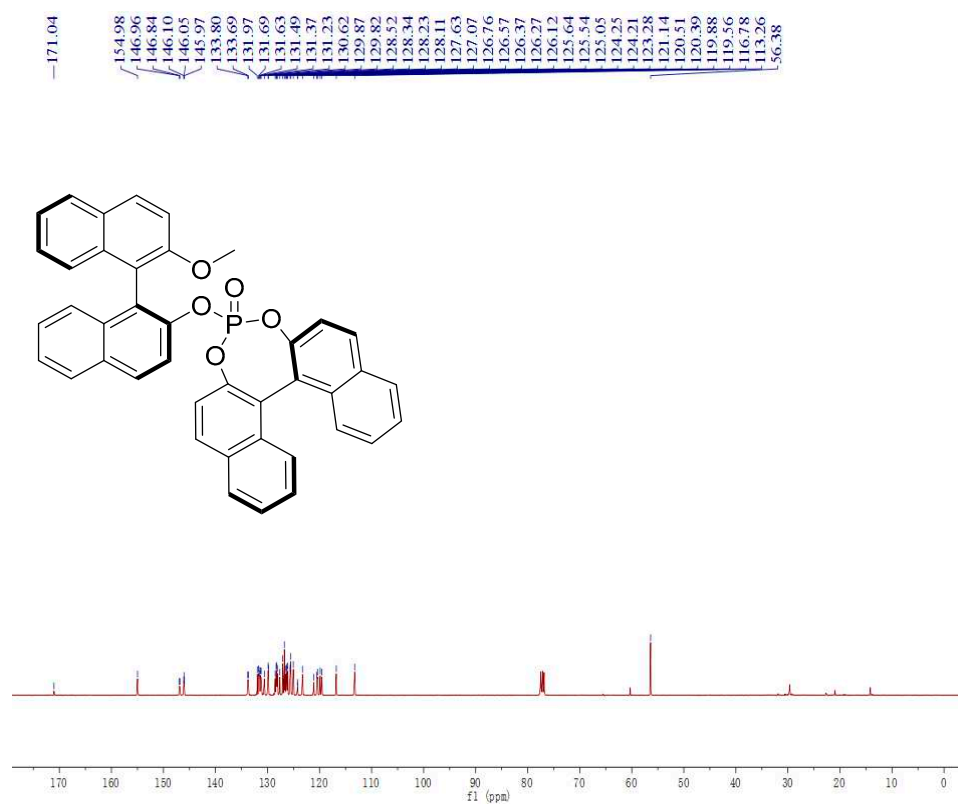

**Fig. S21** <sup>13</sup>C-NMR spectrum of (*S, R*)-**P8** (100 MHz, CDCl<sub>3</sub>)

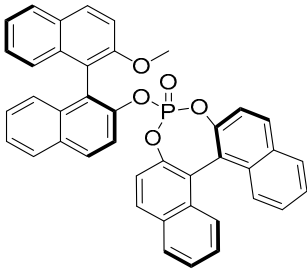[illegible]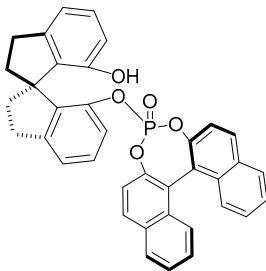

S29

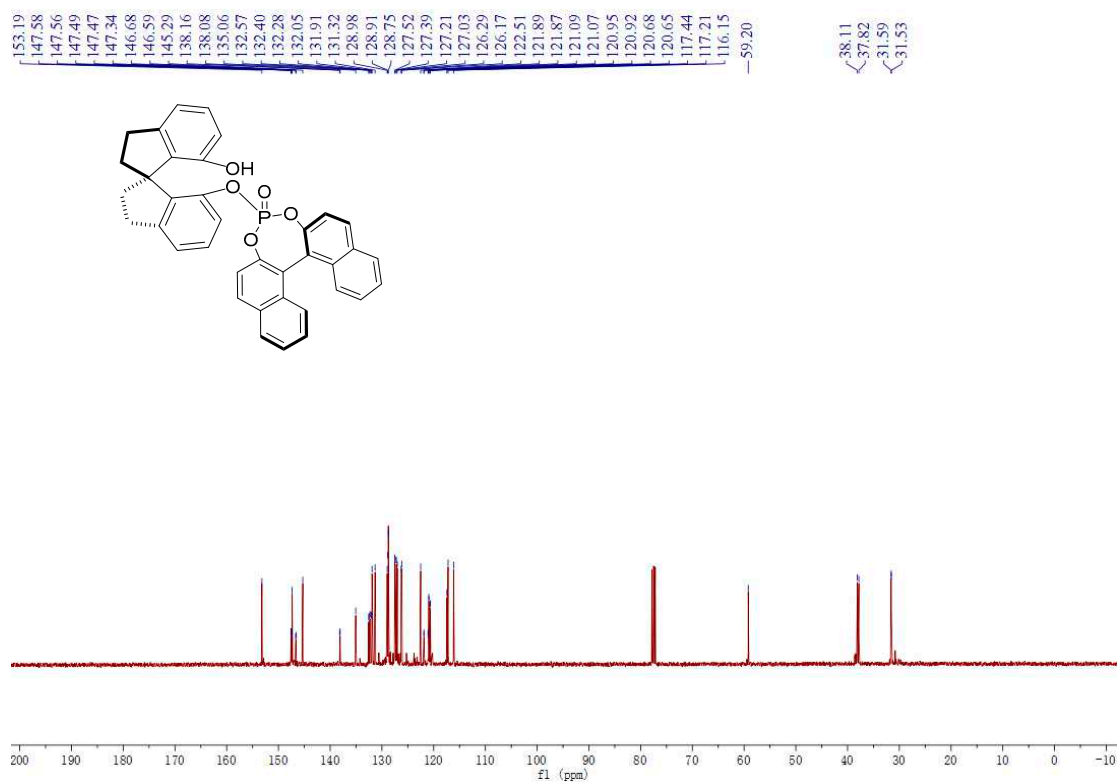

**Fig. S24**  $^{13}\text{C}$ -NMR spectrum of (*R, R*)-P9 (100 MHz,  $\text{CDCl}_3$ )

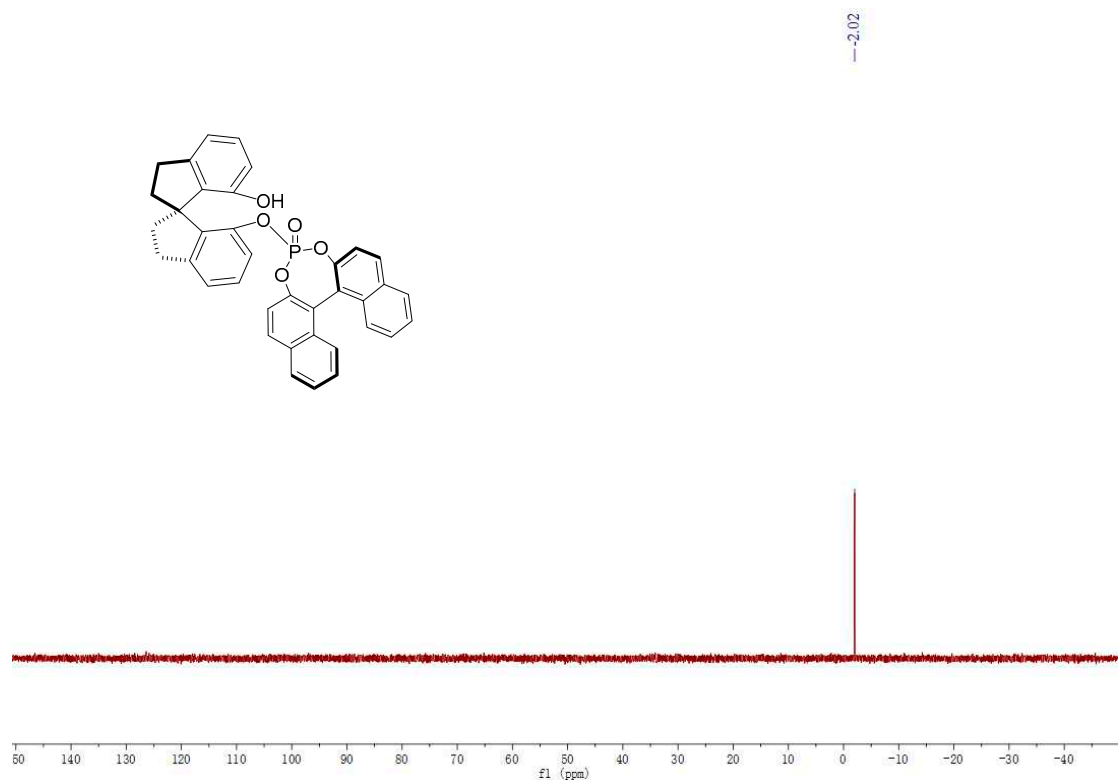

**Fig. S25**  $^{31}\text{P}$ -NMR spectrum of (*R, R*)-P9 (161 MHz,  $\text{CDCl}_3$ )

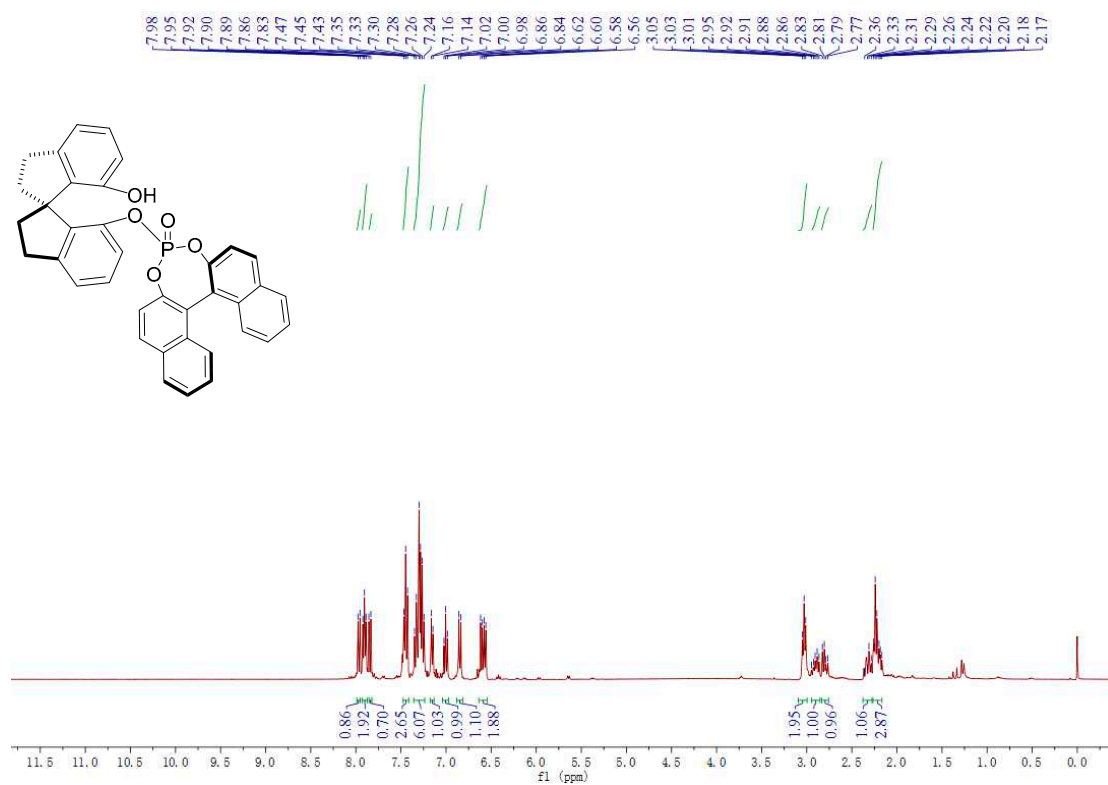

**Fig. S26**  $^1\text{H}$ -NMR spectrum of *(S, R)*-P10 (400 MHz,  $\text{CDCl}_3$ )

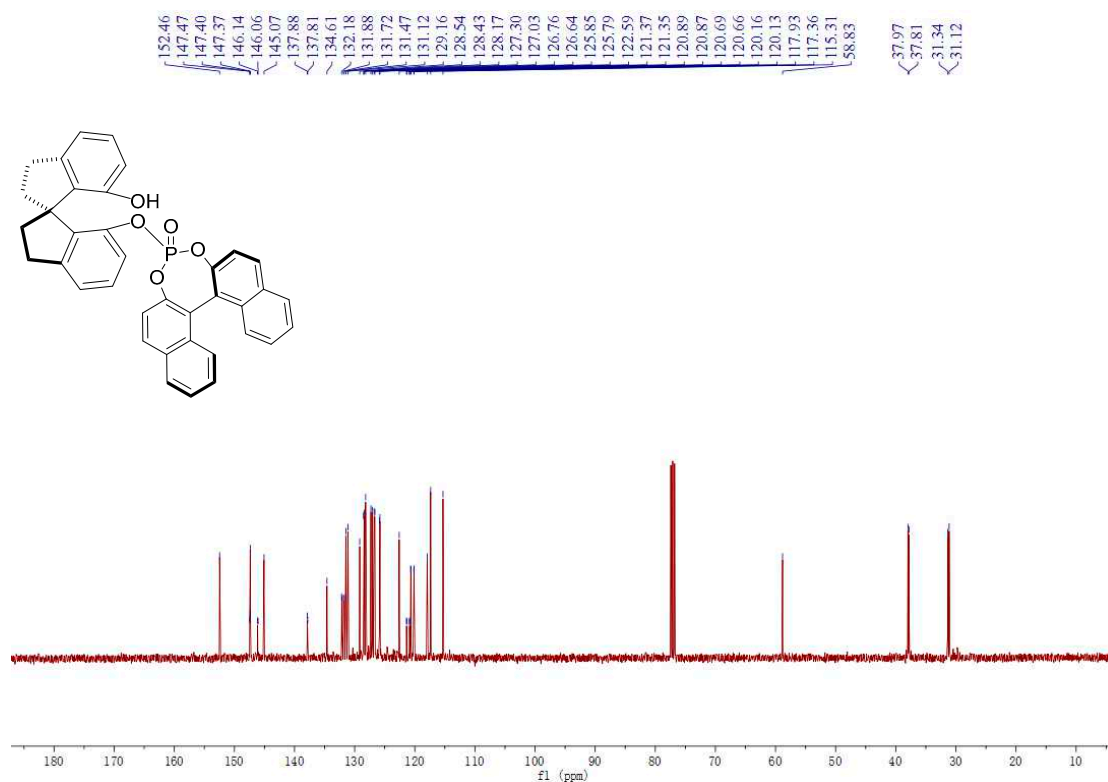

**Fig. S27**  $^{13}\text{C}$ -NMR spectrum of *(S, R)*-P10 (161 MHz,  $\text{CDCl}_3$ )

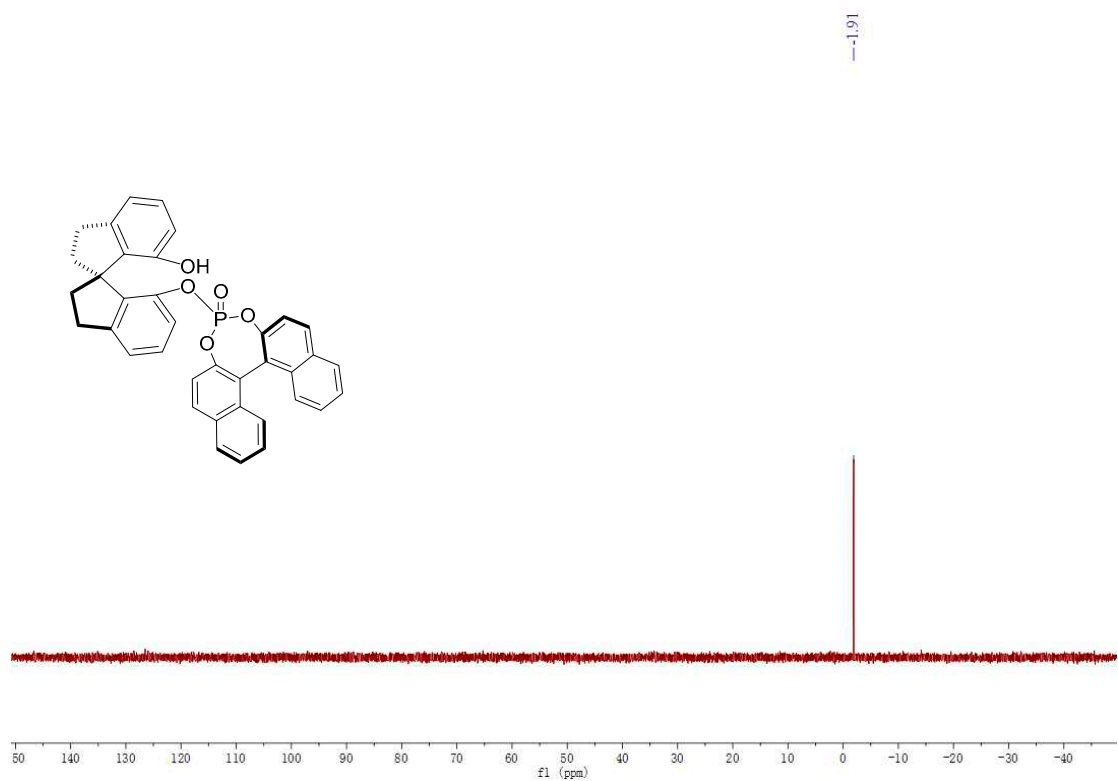

**Fig. S28**  $^{31}\text{P}$  NMR spectrum of *(S, R)*-P10 (161 MHz,  $\text{CDCl}_3$ )

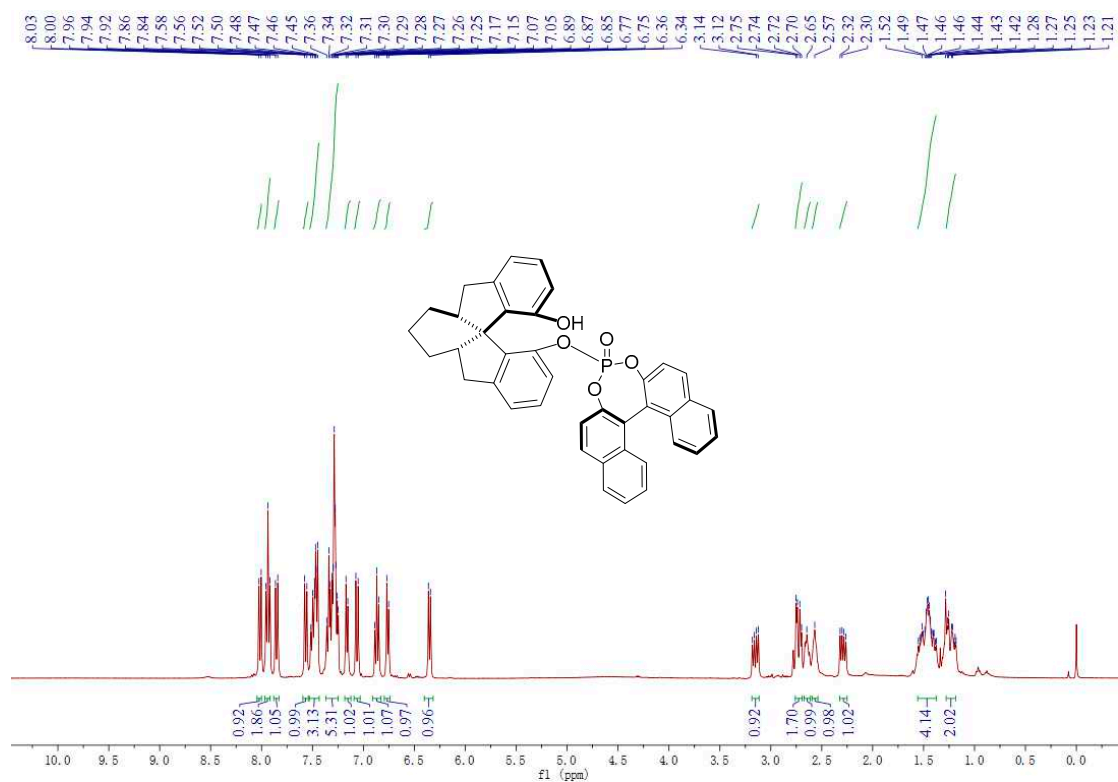

**Fig. S29**  $^1\text{H}$  NMR spectrum of *(S, S, S, S)*-P11 (400 MHz,  $\text{CDCl}_3$ )



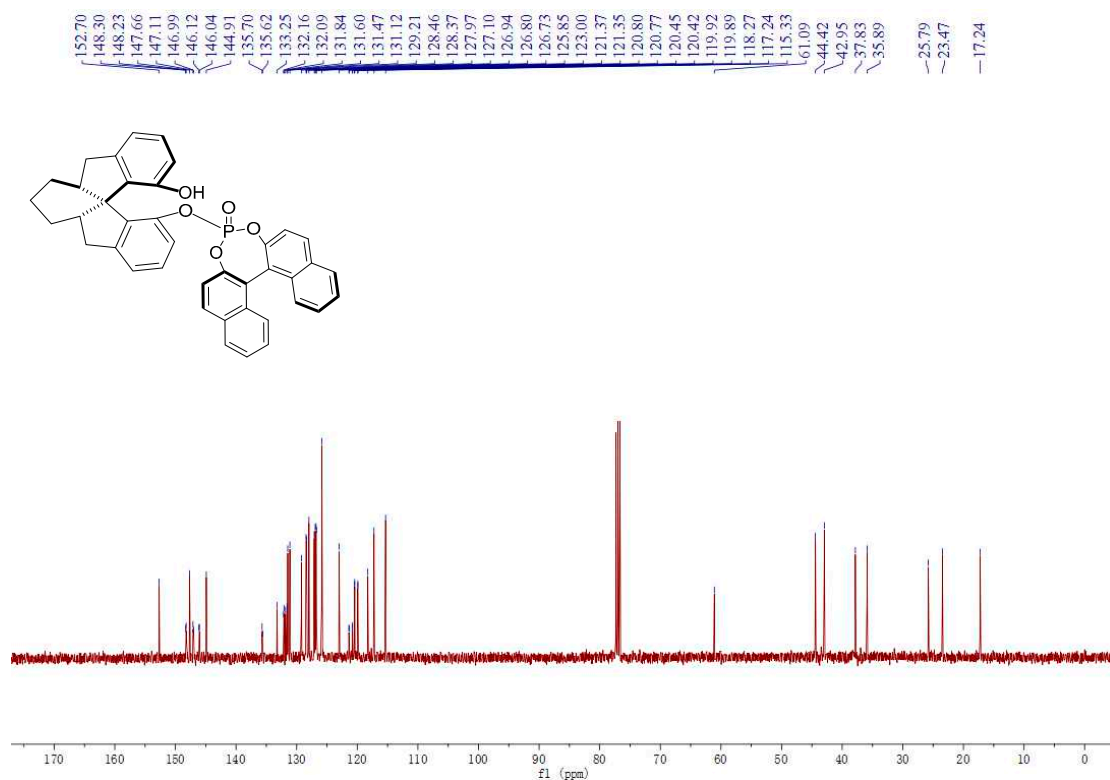

**Fig. S30**  $^{13}\text{C}$  NMR spectrum of (S, S, S, S)-P11 (100 MHz,  $\text{CDCl}_3$ )

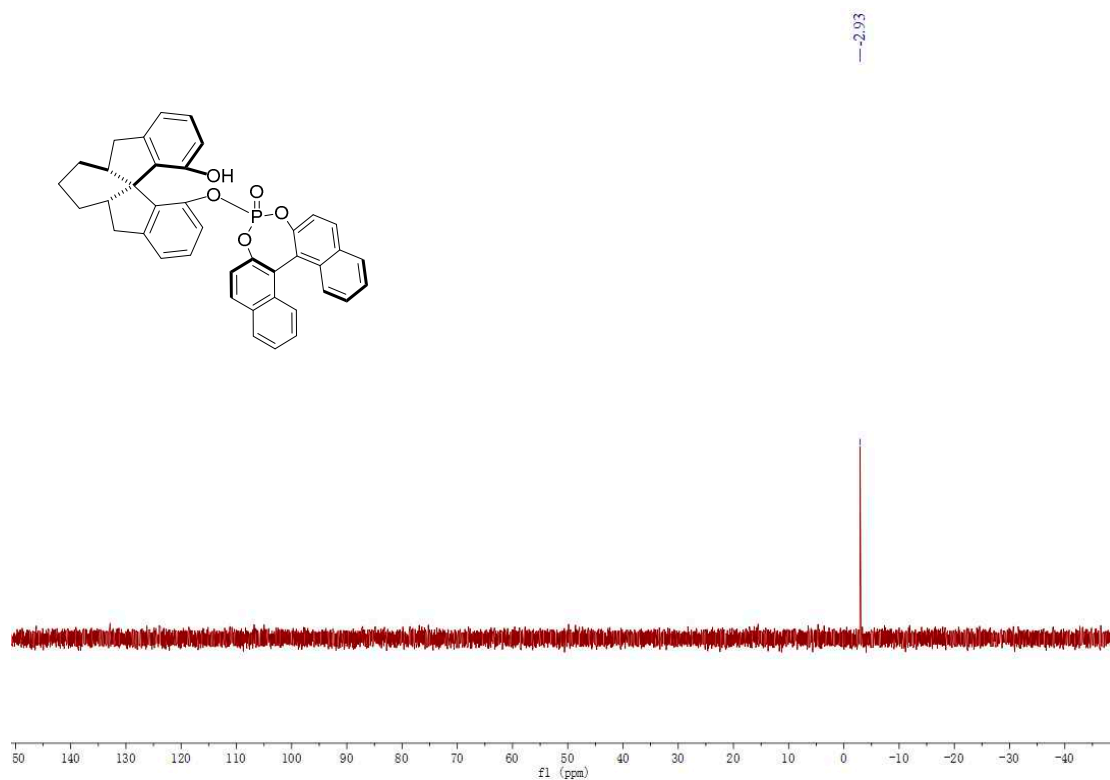

**Fig. S31**  $^{31}\text{P}$  NMR spectrum of (S, S, S, S)-P11 (400 MHz,  $\text{CDCl}_3$ )

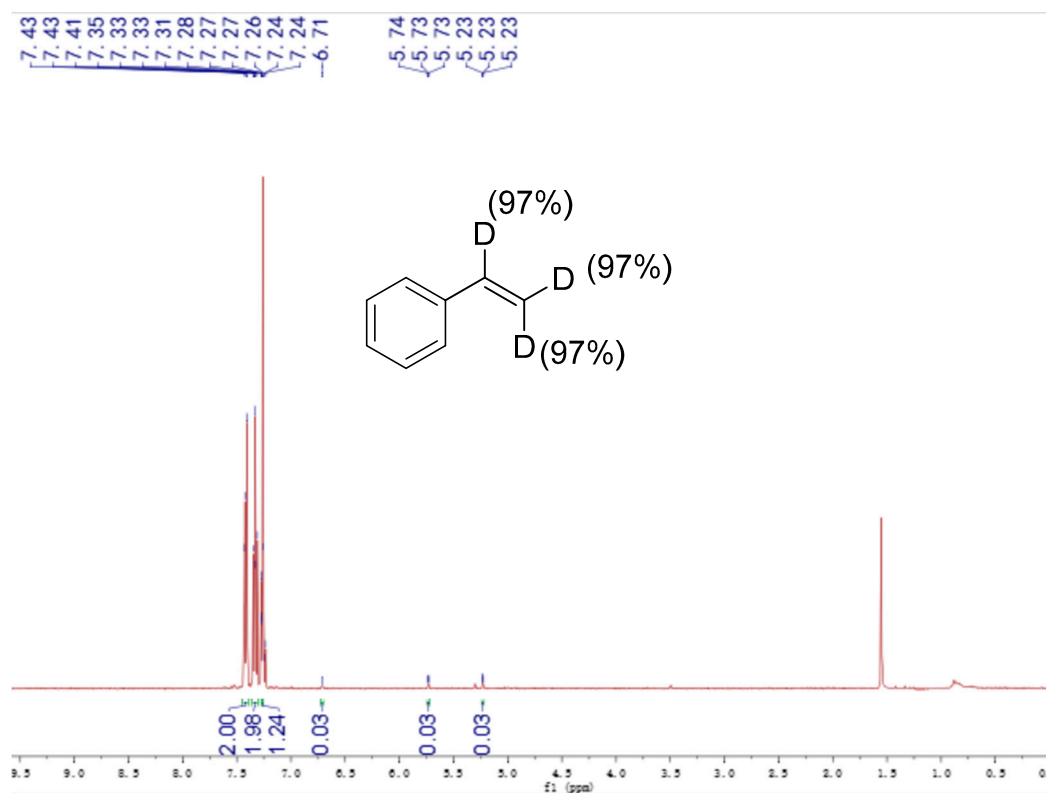

**Fig. S32** <sup>1</sup>H NMR spectrum of **1a<sup>D</sup>** (400 MHz, CDCl<sub>3</sub>)

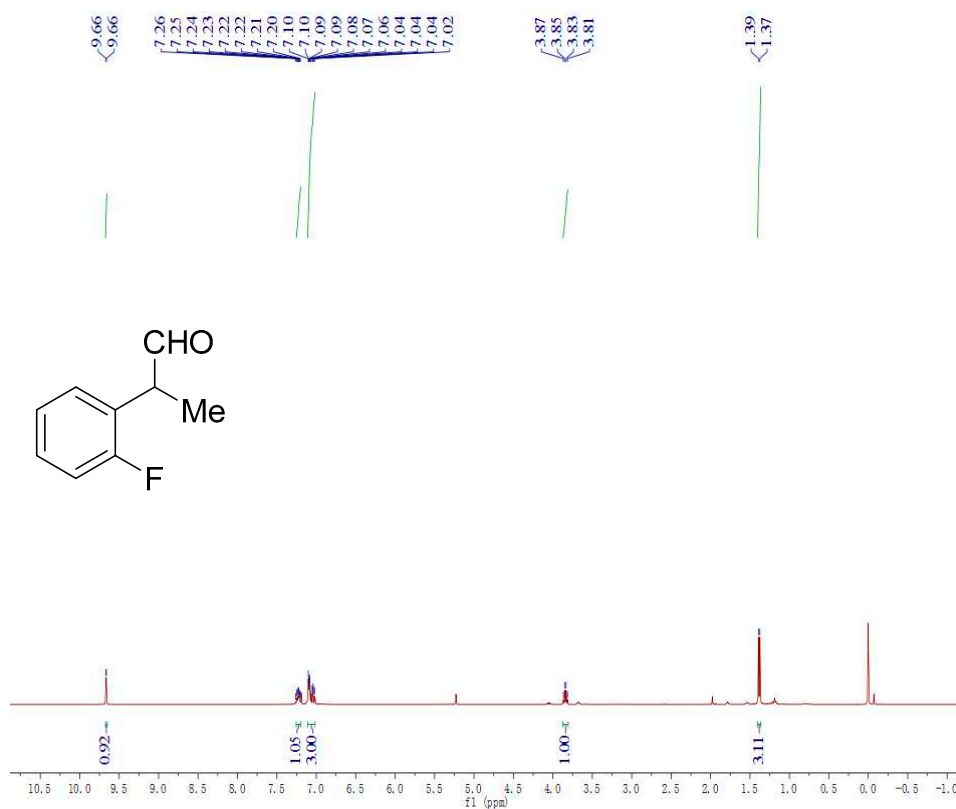

**Fig. S33** <sup>1</sup>H NMR spectrum of **2b** (400 MHz, CDCl<sub>3</sub>)

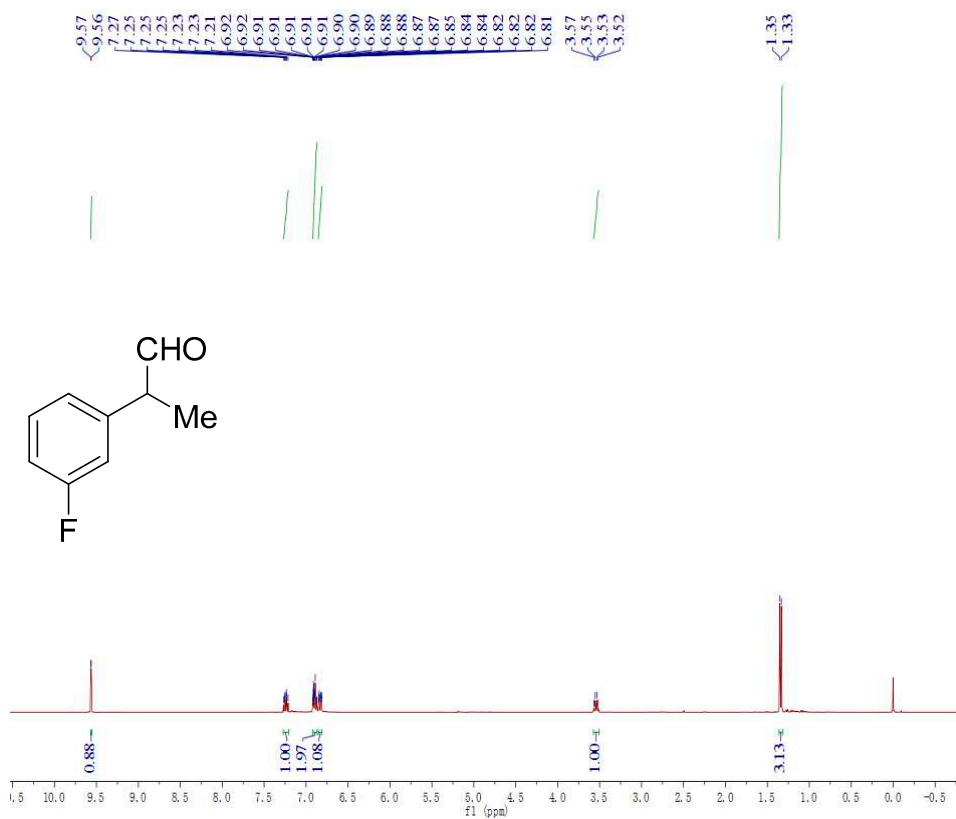

**Fig. S34** <sup>1</sup>H NMR spectrum of **2c** (400 MHz, CDCl<sub>3</sub>)

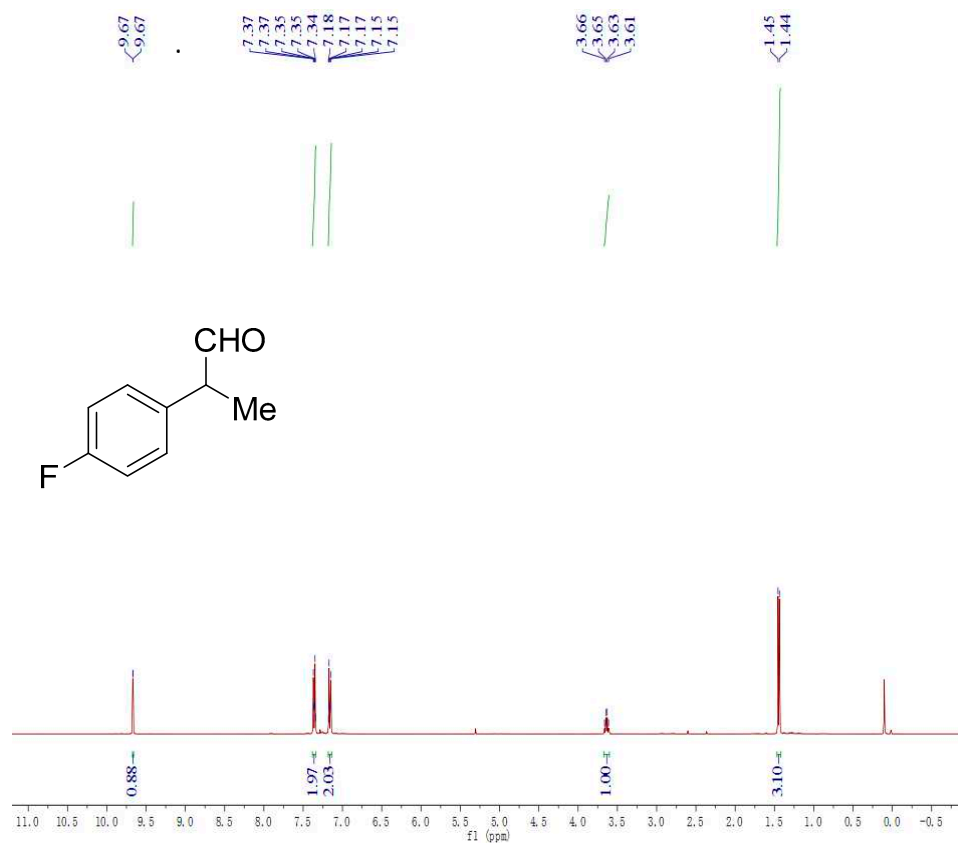

**Fig. S35** <sup>1</sup>H NMR spectrum of 2d (400 MHz, CDCl<sub>3</sub>)

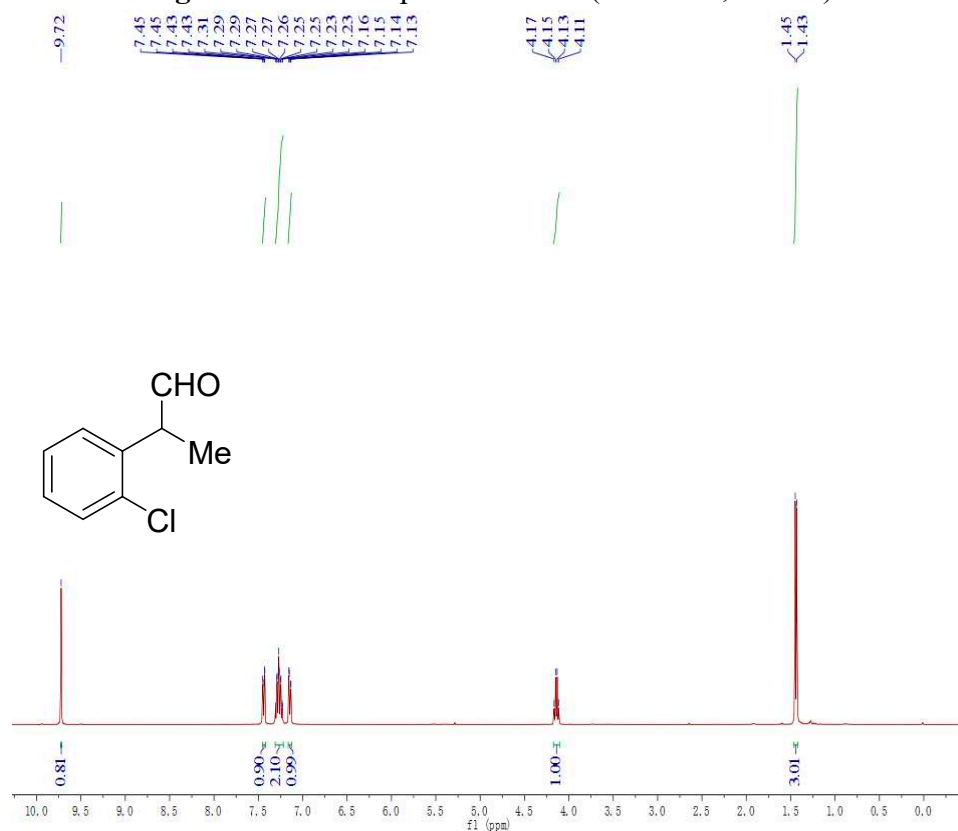

**Fig. S36** <sup>1</sup>H NMR spectrum of 2e (400 MHz, CDCl<sub>3</sub>)

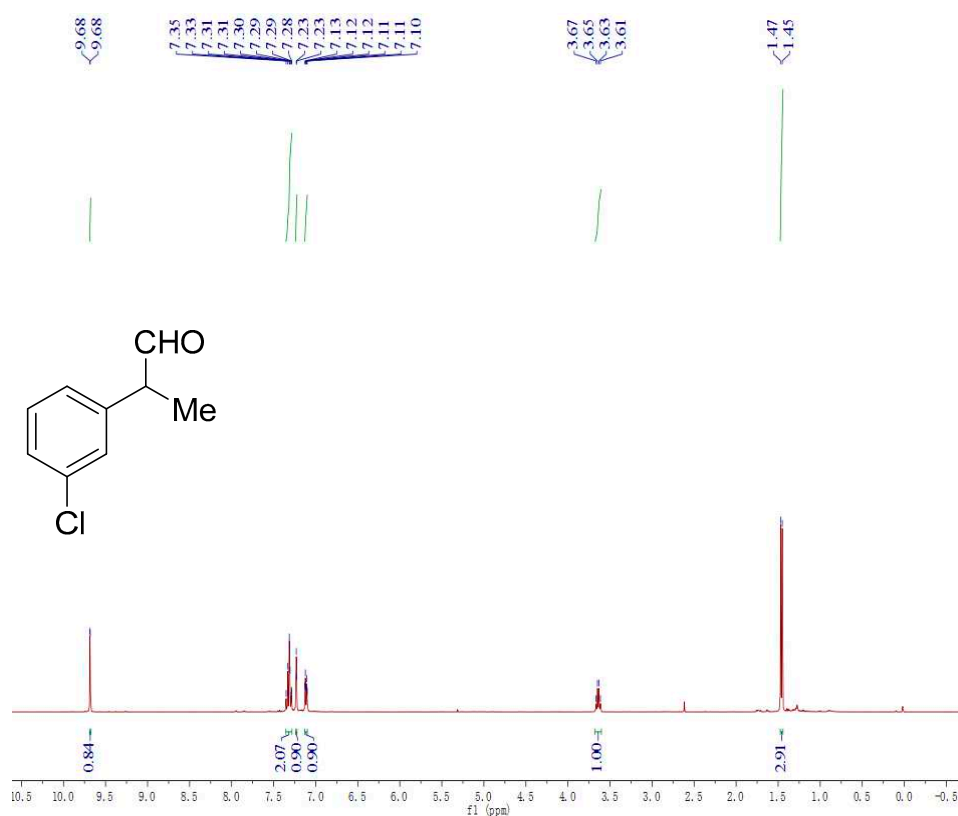

**Fig. S37** <sup>1</sup>H NMR spectrum of **2f** (400 MHz, CDCl<sub>3</sub>)

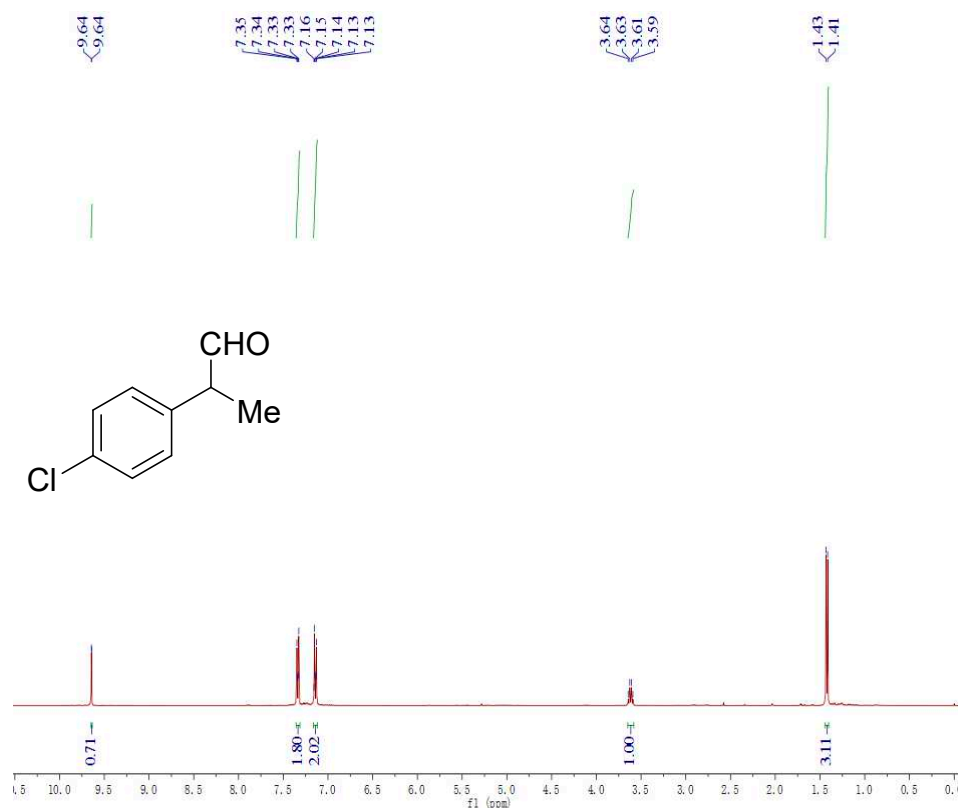

**Fig. S38** <sup>1</sup>H NMR spectrum of **2g** (400 MHz, CDCl<sub>3</sub>)

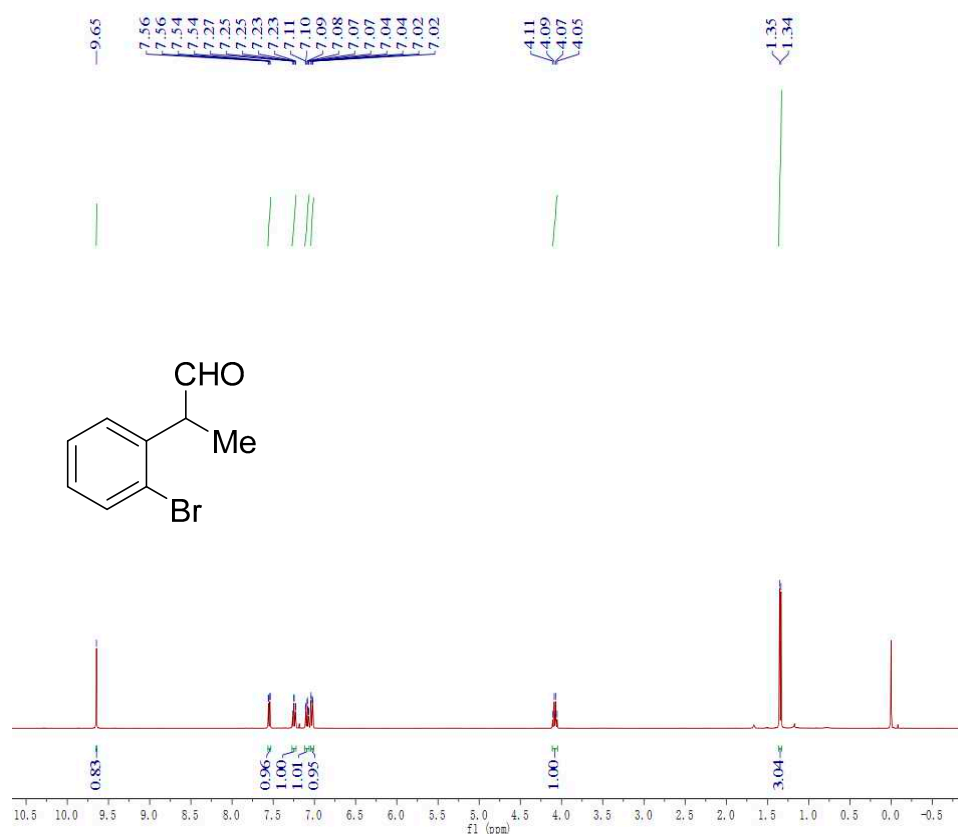

**Fig. S39** <sup>1</sup>H NMR spectrum of **2h** (400 MHz, CDCl<sub>3</sub>)

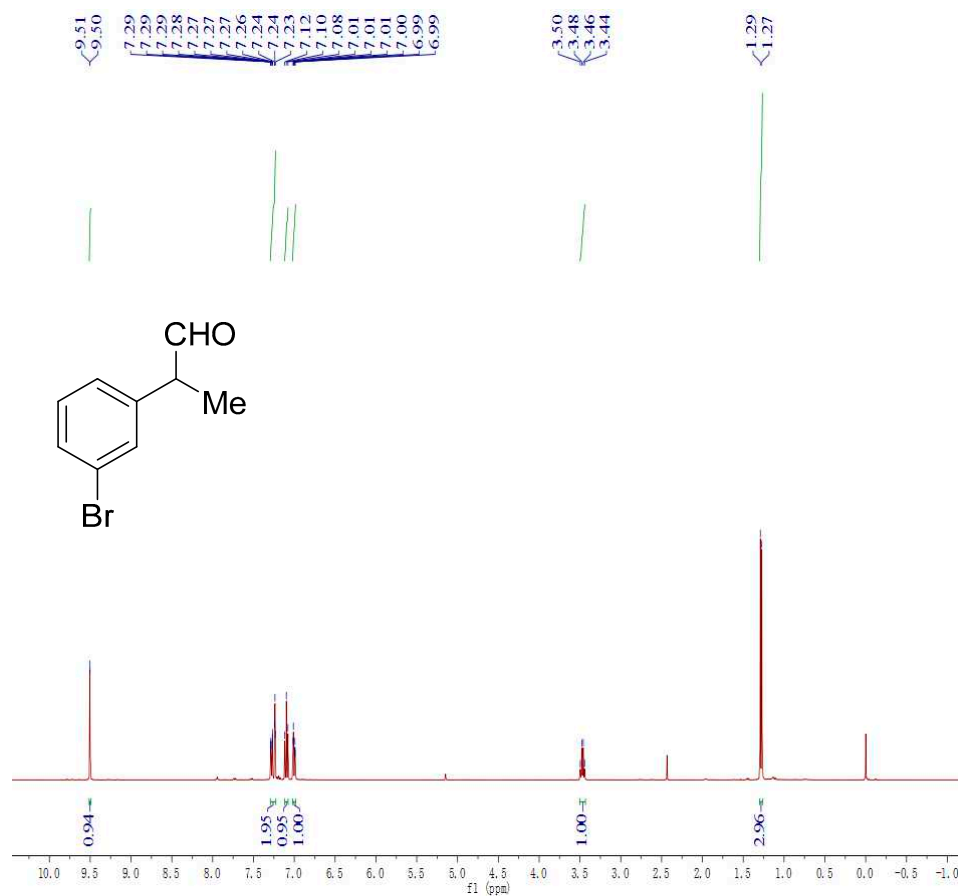

**Fig. S40** <sup>1</sup>H NMR spectrum of **2i** (400 MHz, CDCl<sub>3</sub>)

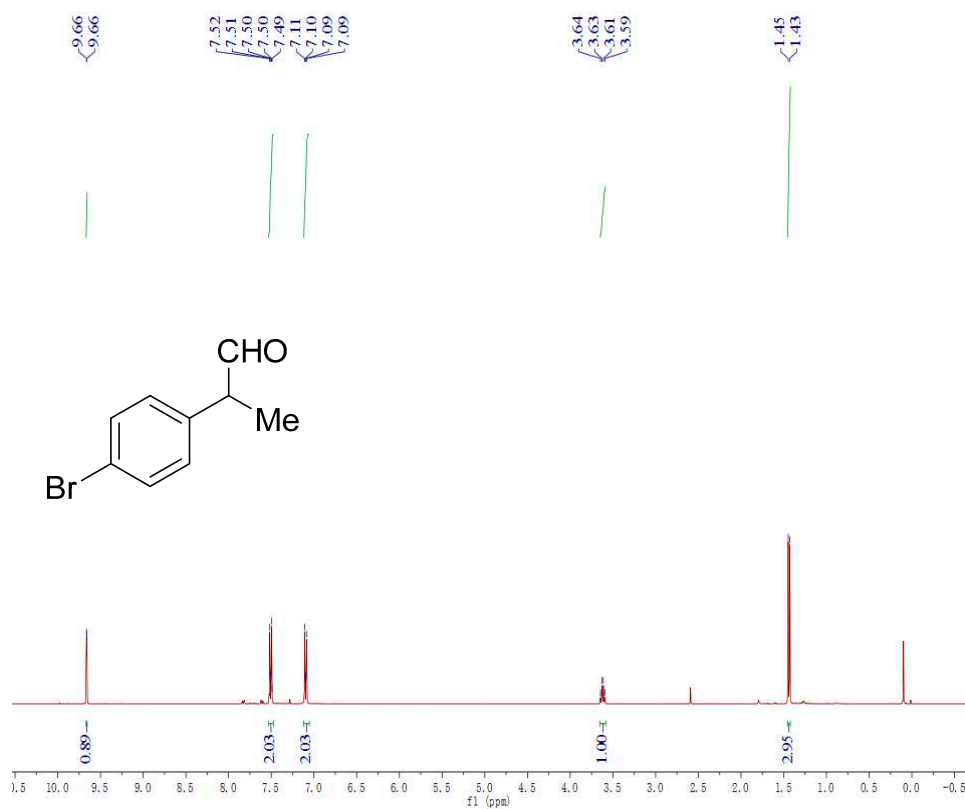

**Fig. S41** <sup>1</sup>H NMR spectrum of **2j** (400 MHz, CDCl<sub>3</sub>)

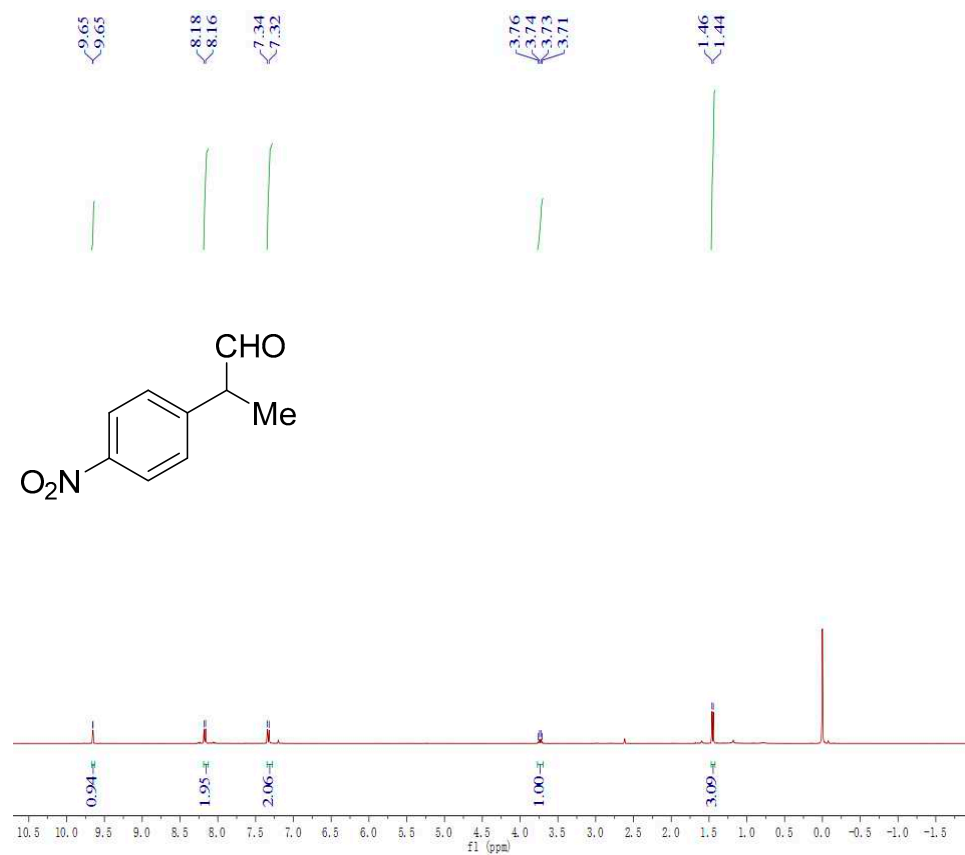

**Fig. S42** <sup>1</sup>H NMR spectrum of **2k** (400 MHz, CDCl<sub>3</sub>)

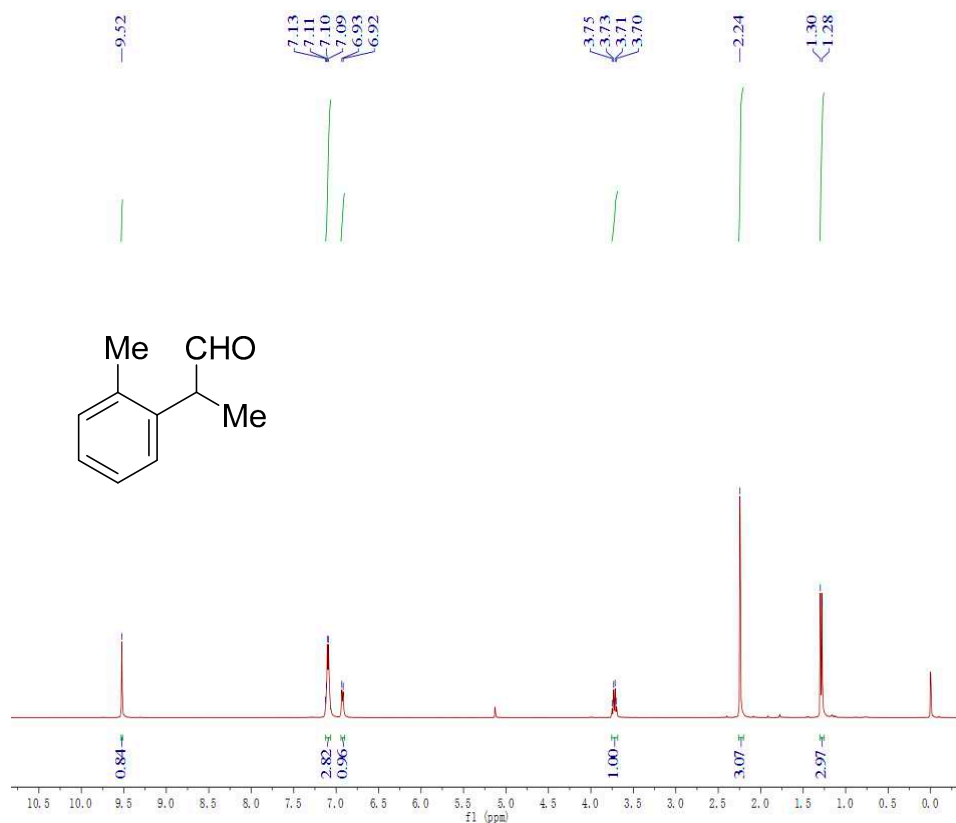

**Fig. S43** <sup>1</sup>H NMR spectrum of **2l** (400 MHz, CDCl<sub>3</sub>)

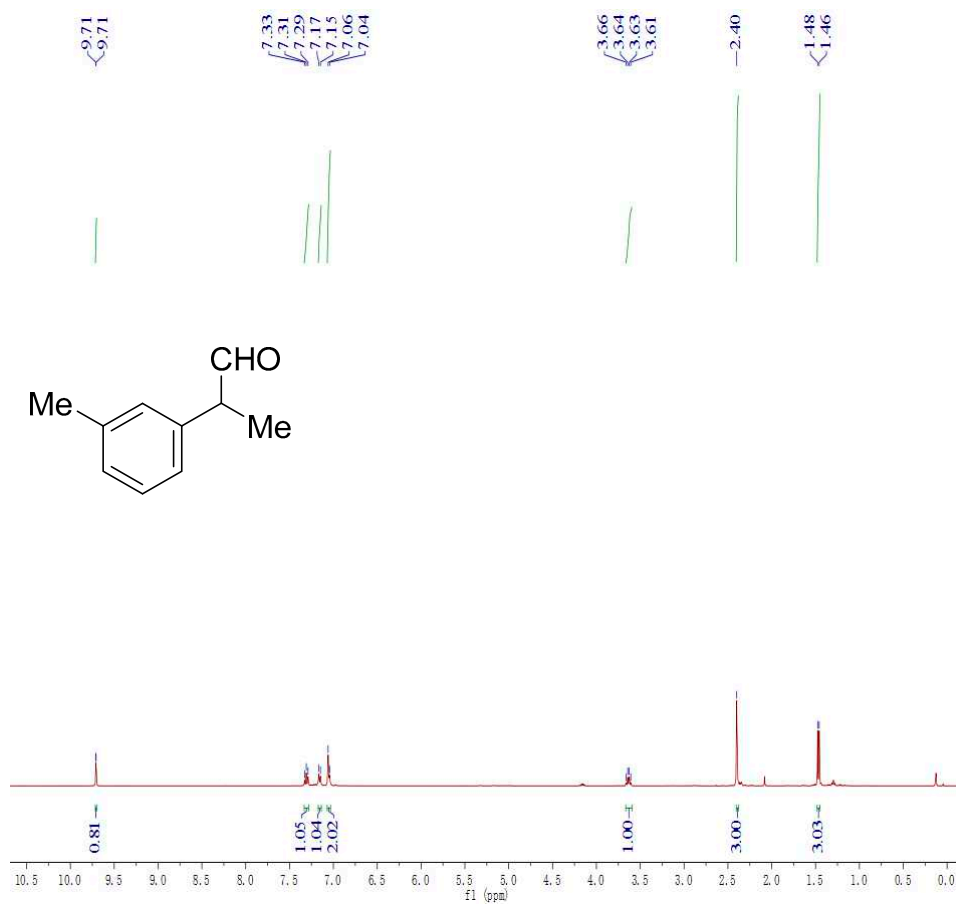

**Fig. S44** <sup>1</sup>H NMR spectrum of **2m** (400 MHz, CDCl<sub>3</sub>)



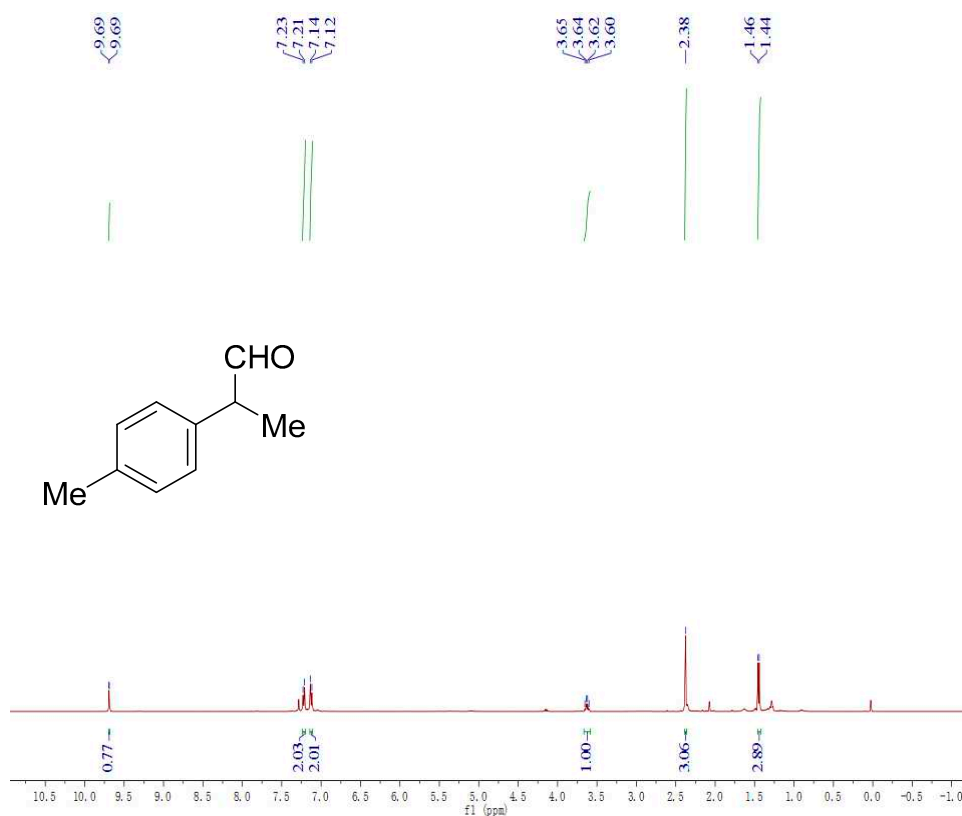

**Fig. S45** <sup>1</sup>H NMR spectrum of **2n** (400 MHz, CDCl<sub>3</sub>)

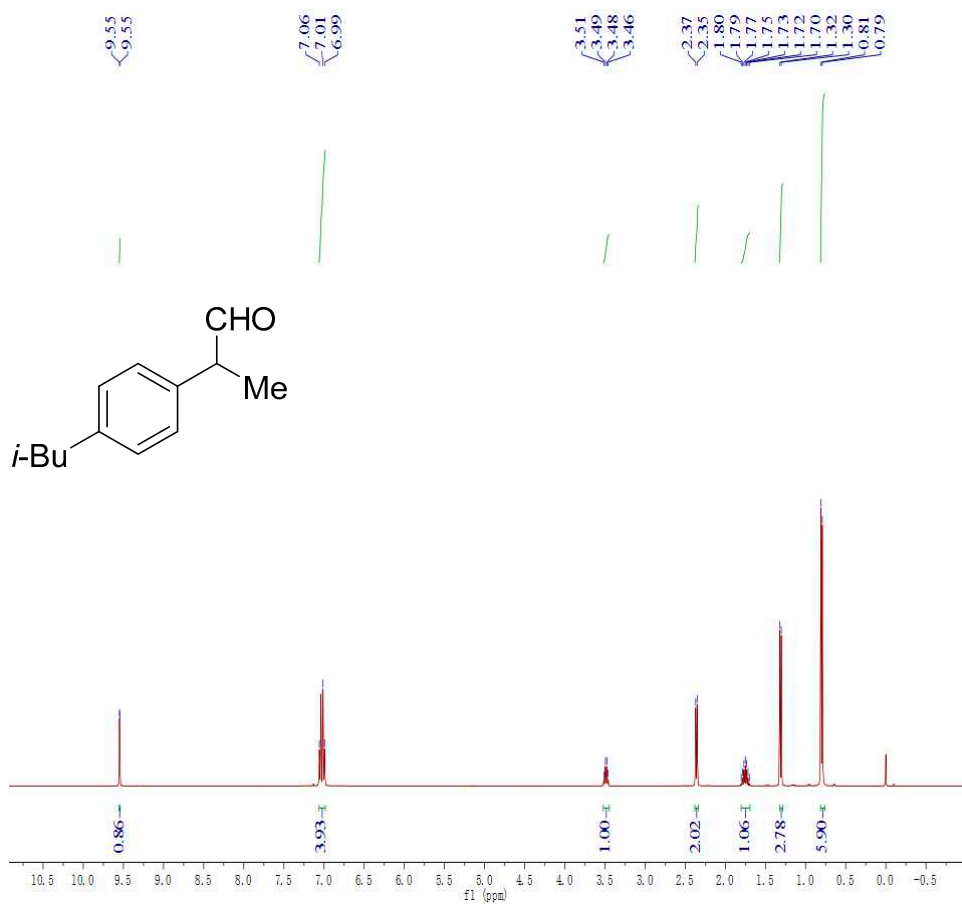

**Fig. S46** <sup>1</sup>H NMR spectrum of **2o** (400 MHz, CDCl<sub>3</sub>)

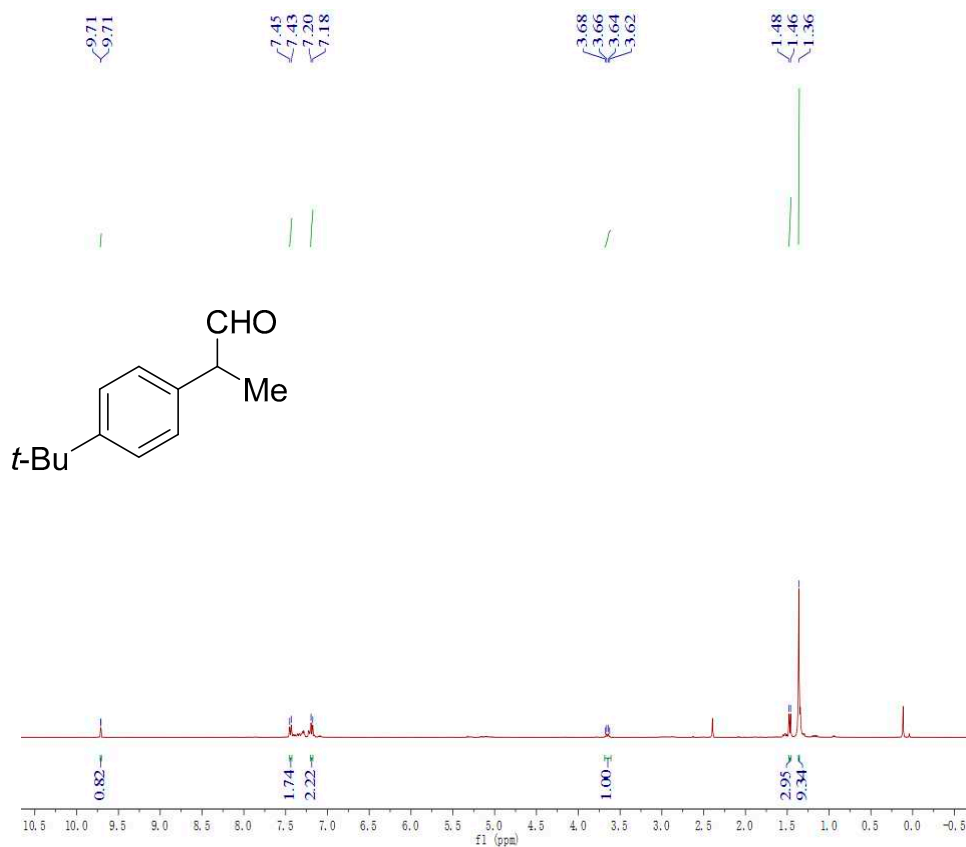

**Fig. S47** <sup>1</sup>H NMR spectrum of **2p** (400 MHz, CDCl<sub>3</sub>)

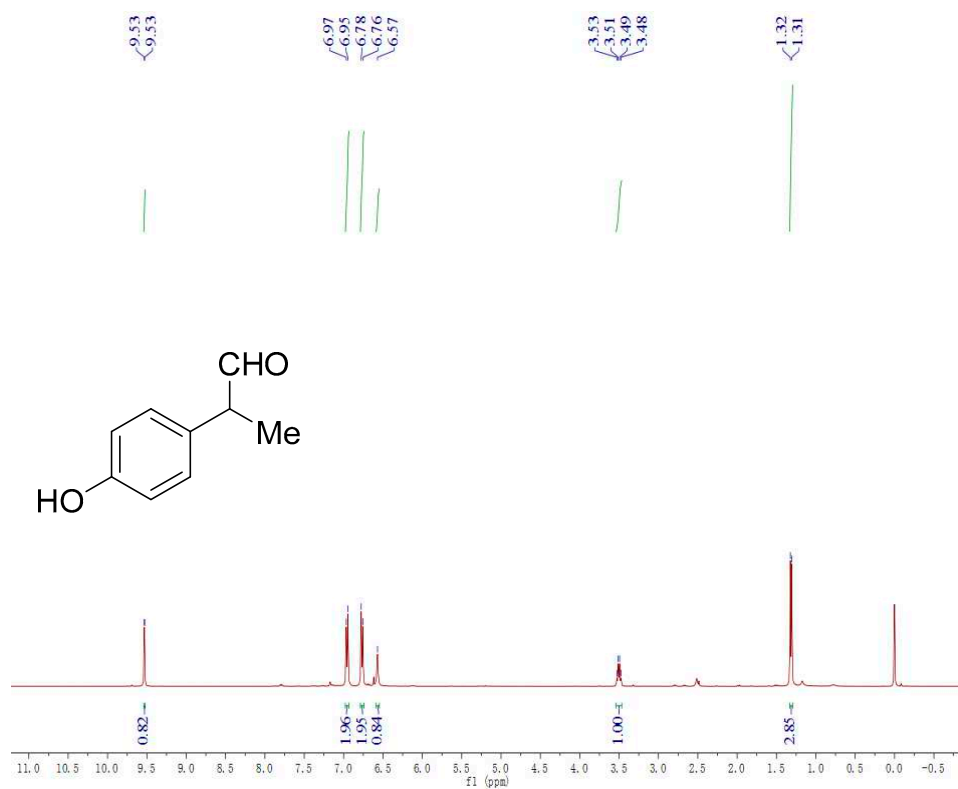

**Fig. S48** <sup>1</sup>H NMR spectrum of **2q** (400 MHz, CDCl<sub>3</sub>)

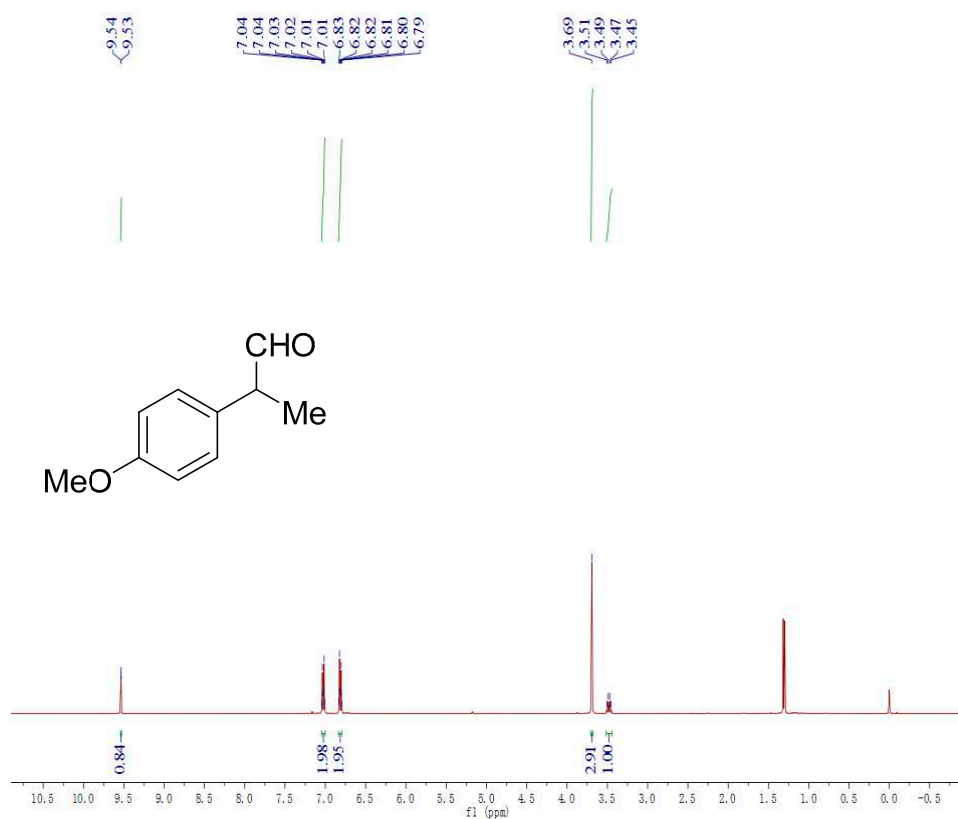

**Fig. S49** <sup>1</sup>H NMR spectrum of **2r** (400 MHz, CDCl<sub>3</sub>)

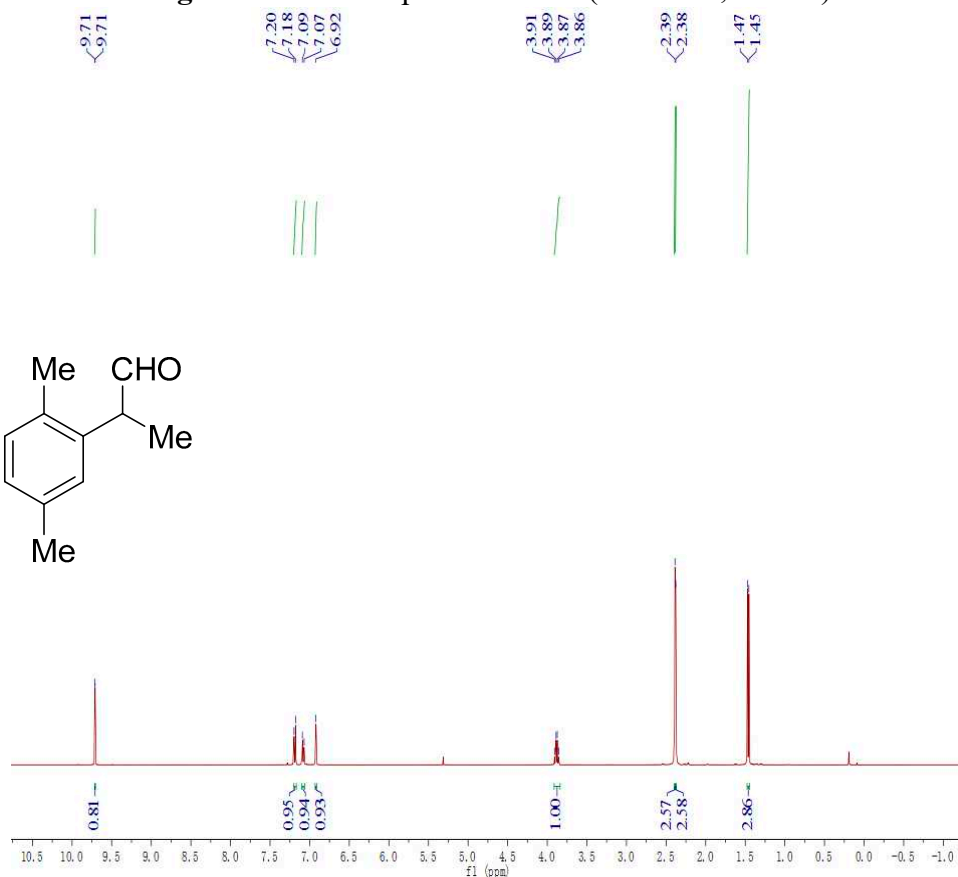

**Fig. S50** <sup>1</sup>H NMR spectrum of **2s** (400 MHz, CDCl<sub>3</sub>)

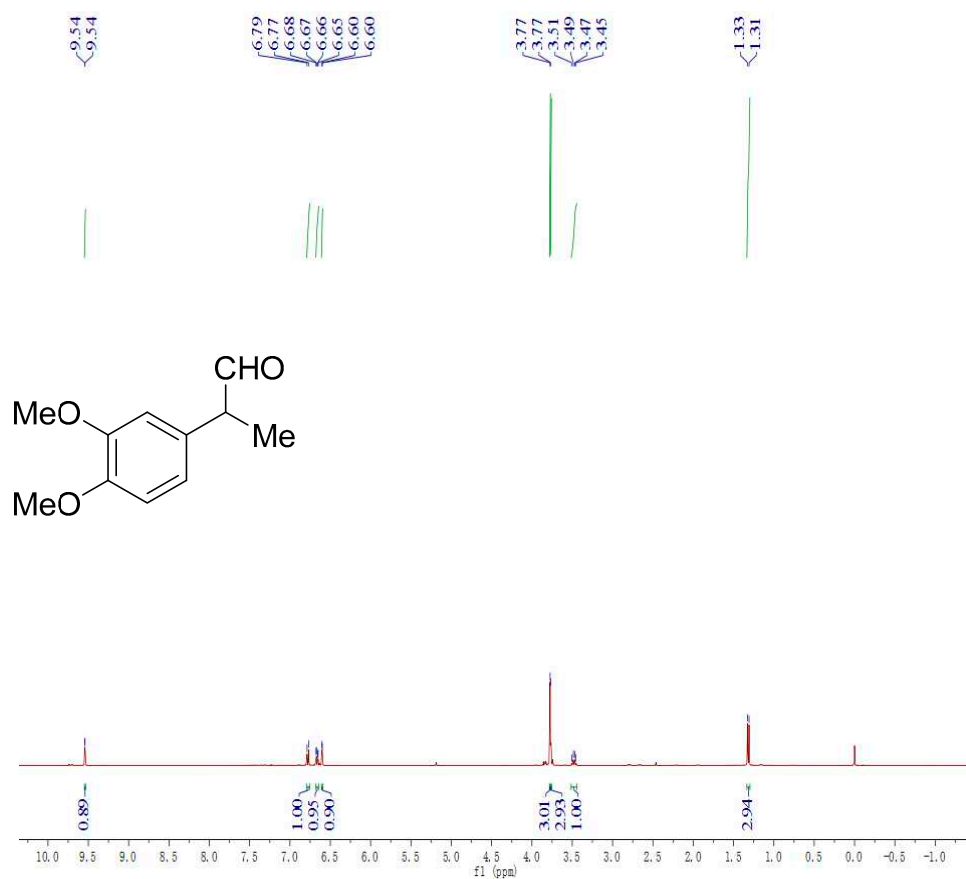

**Fig. S51** <sup>1</sup>H NMR spectrum of **2t** (400 MHz, CDCl<sub>3</sub>)

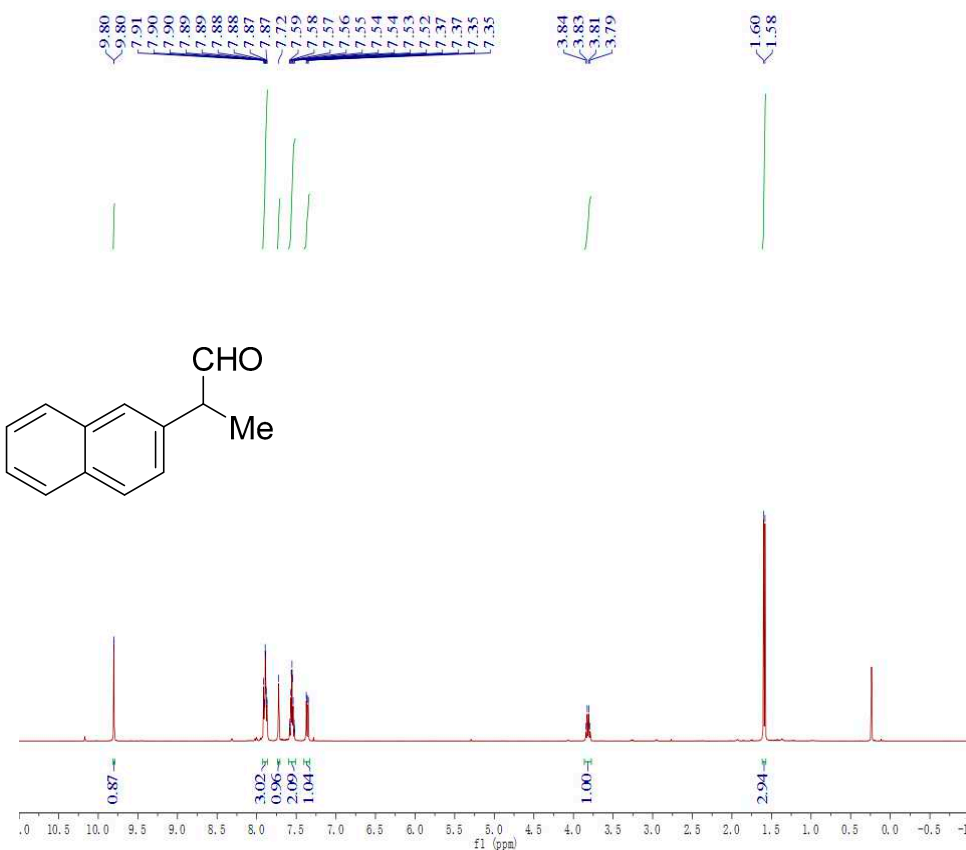

**Fig. S52** <sup>1</sup>H NMR spectrum of **2u** (400 MHz, CDCl<sub>3</sub>)

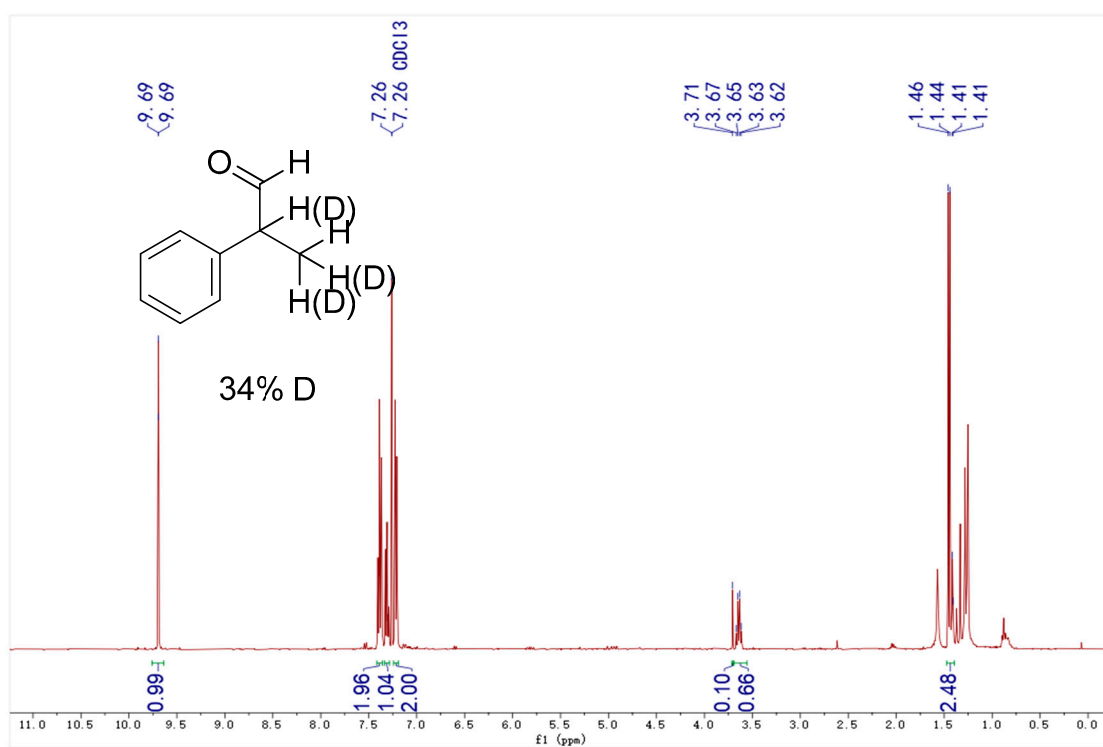

Fig. S53 <sup>1</sup>H NMR spectrum of **2a/2a<sup>D</sup>** (400 MHz, CDCl<sub>3</sub>)

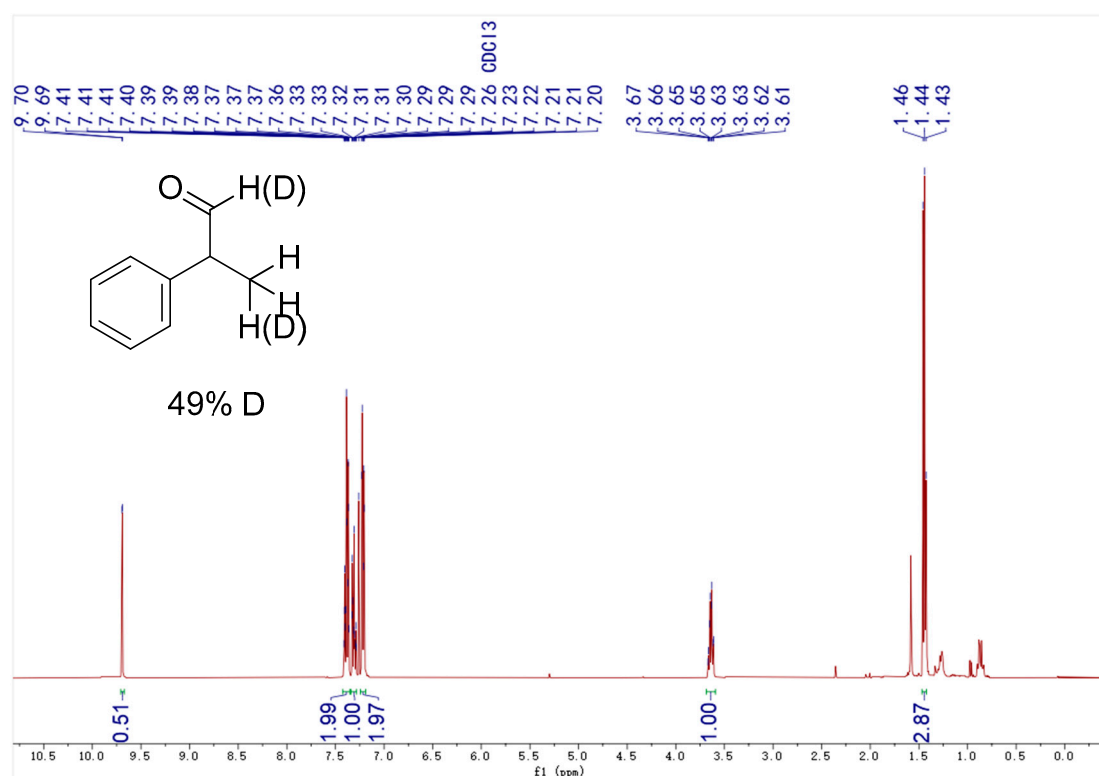

Fig. S54 <sup>1</sup>H NMR spectrum of **2a<sup>D</sup>** (49% D, 400 MHz, CDCl<sub>3</sub>)

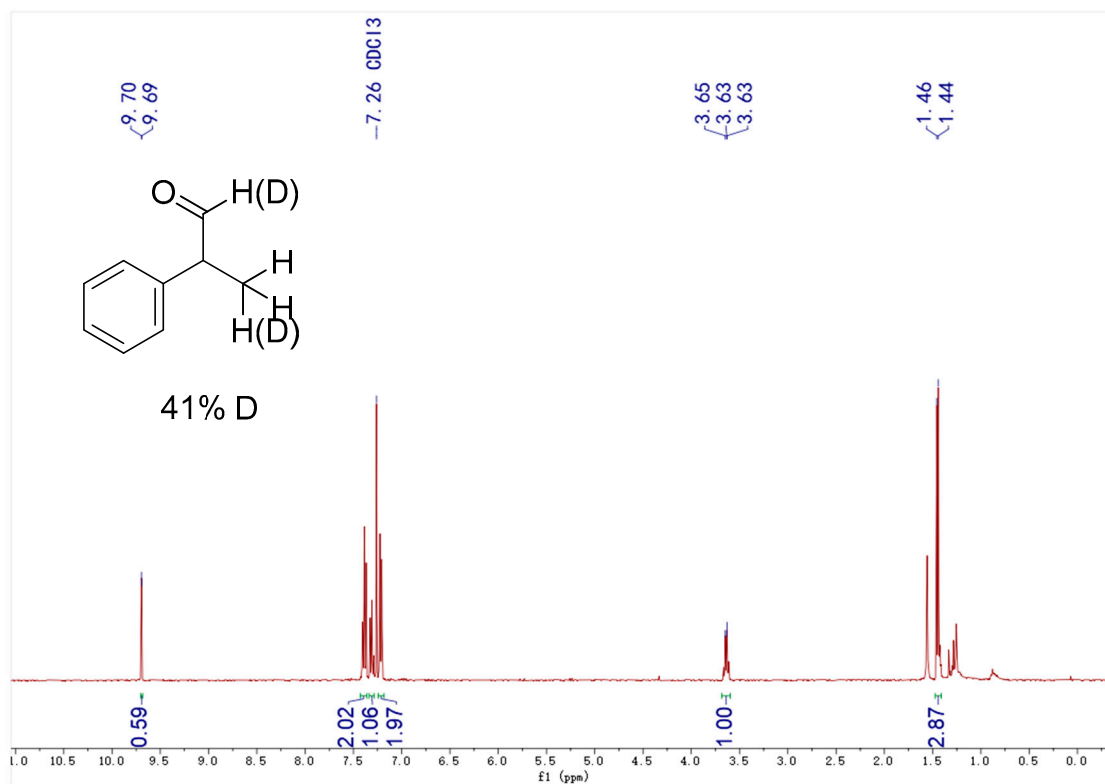

**Fig. S55** <sup>1</sup>H NMR spectrum of **2a<sup>D</sup>** (41% D, 400 MHz, CDCl<sub>3</sub>)
